# Supplementary material for: Detection of T. urartu Introgressions in Wheat and Development of a Panel of Interspecific Introgression Lines
Source: Front Plant Sci. 2018 Oct 29;9:1565. doi: 10.3389/fpls.2018.01565 (PMC6216105; doi:10.3389/fpls.2018.01565)
Supplement: Supplementary file 1 [file Table_1.XLSX]

## Sheet: Sheet1
Table S1 Distribution of SNP markers along each of the seven Au chromosomes of T. urartu as depicted on the genetic map. Physical positions of markers on the A, B and D genomes of wheat and the Au genome (Tu chromosomes) of T. urartu are displayed for each linkage group obtained through performing a BLAST search of the marker sequences against the IWGSC RefSeq v1.0 (Wheat@URGI portal) and the Tu …
Locus
Markers	Gen_Map cM	Chr_Agen	Phy_pos	Chr_Bgen	Phy_pos	Chr_Dgen	Phy_pos	Chr_Tugen	Phy_pos	Marker Sequences
Chr1Au
AX-94908152	0	1A	12355652	1B	15290722	1D	10383095	TuUngrouped_contig_4890	4814	TGAGAATTGGCCATGCCCTTTGGAAGATTGCGATCGAGAGCAGCTATTTC[Y]AGACATGTGGTGGACTGAGGCACTGAGCACTCATGGTCGTGGTGCAAGCC
AX-94521075	1.695	1A	15232679	1B	20566615	1D	14480634	Tu1	19837234	GGAAGTGATGGCATCCTGCCTGCTGAAAAGTCGATAGTTGTGCAAGAGAT[S]ATGTATATTCAAGGGCCTTGCCTTGACGTGTCCTCTGGTTGTTCTTGGTT
AX-95109946	20.128	1A	31374335	1B	50044851	1D	32544448	Tu1	33295522	GATCGCAGCCCCACACCTGATCGCAGTCGGAGCCCCAGGCGATCCATCTC[M]CCTGTAGCAAAGGATAATGGTGATAGCCCTCGGGGCAGGGATAAGAGCAG
AX-95163118	20.128	1A	36162529	1B	56864247	1D	37221045	Tu1	38658864	ACGCGTATGGTCGCCCTGTGAACGTTCGAGCAGGGTACAATCGTCTAACC[R]TCTCGCTAATCCATTTTTGAGGATGAGGCAGTTCTGATGAAAGCACAGGT
AX-94503609	35.07	1A	62206426	1B	104192363	1D	63896658	Tu1	60478002	AGAAGAGGAAATGGTGTTACAAGTGGCTTCACCTAAGAATACCTCGACTT[R]GTTATGACATATAGCATGCTCCGAGAATGATGTTAATCACAGTAGTAGGA
AX-94736869	35.07	1A	84627573	1B	142019642	1D	89126004	Tu1	87939970	GTGGATTTCTCGGAGGCGAGCAAGGTCGCGGGTCACCTGACTCCGGTCCC[Y]GGAGGCGTCGGGCCGATGACCGTGGCGATGTTGCTGAAGAACACGGTGGA
AX-95151422	35.07	1A	89751245	1B	148132325	1D	93100268	Tu1	93280187	GGCCGGGTATCTCGGGAGTGGGCAAGCTGAGGAGGCTCTGGGCTTGTTTG[Y]GTCAATGGTTTCTTGTGAGGTTGGCGCAGATGGCTTCTCGTATGCCATAA
AX-94673150	35.07	1A	100973308	1B	162534134	1D	103408196	Tu1	113659451	CAGTAAATGATTCACTTTGCAGACTAAATTCCTCACAGGAGACGAACCCT[R]GTGGGTTAGTGTCAGTGCACCCCCACCAACATAGGGACACTTGATCCCCA
AX-94510917	35.07	1A	119603748	1B	172094076	1D	112770072	Tu1	122325443	GCTTAAATTTTGTTTGCTGATCCTATGATGGATCTGAATCTGATCCTGGGKCCTTCCTCCCAAGATACCAGAGCTCGGTTTCGCGACGGACAGCGGGGAAA
AX-95014575	36.336	1A	72893175	1B	115684722	1D	73679780	Tu1	74573703	ATCCAGTTCAACTGTTCAACAAGTATAACCAAAAAACTGGAAACTTTGAG[Y]GGCATTCGCGACAAAGGACTGTTACTGACCTGACTGATGGTGTTCCGCAA
AX-94684631	36.336	Un	976321	1B	120370061	1D	76977068	Tu1	79725839	AGTCGGACACCATGAGTCCAGTGACAGTGGAAAGTAAGTTTTGACAGCTA[R]GAAGTTCGAGCTTAGCTTGGATATATTTAGATGACGAAGGTTGCATGAAG
AX-94452564	36.336	Un	976442	1B	120369940	1D	76976947	Tu1	79725718	CTGGCCTCACACTGGCGACATAGATTTCTAATTCTCTAAGATTGC[R]GAGCAAGCTCATCCAGTTTGGAACCTTGTCAATGAAACAGTATGTTATGTGAAGC
AX-94788006	37.177	1A	170600331	1B	252541401	1D	182031963	Tu1	116057066	TTATTTGCTTCCTTCAGCTTTTTCAACAGCTCAAGATGTGAACGGAAATC[Y]TGGAACAAATGATCTATATATCAGTGAGCAAGTGGTCAATAACGACCAGA
AX-95134614	37.177	1A	126449526	1B	176712923	1D	115576218	Tu1	125401061	GCAGCAAAGCTGATGTCTCTGGTTACTGGATGGAATGCGGCATTCCTCTC[R]AGGTGCTCCCATATAAGCCTTCTCCGCTCCTCAGATGCGGCTCGTTTCTC
AX-86173170	37.177	1A	149467181	1B	196579505	1D	141214032	Tu1	120872207	AAGACAGCGGGGTATTTGAGTGCATACCACCAATTGATCGTGCAAACAAC[R]TCCGCGTTAGGTTCAGGTATATTCACAAGTGGGGATACTTATTTATAGTT
AX-94700819	37.177	1A	206399060	1B	223461147	1D	154008966	Tu1	143743647	GATCGCCGGGATTATTACACTGCTCATGGTGAGAATGCAACCTTTATTGC[R]AAGACATACTATCACACAATGACTGCCTTAAGGCAGCTGGGCGGTAACTC
AX-95122888	38.443	1A	223542281			1D	163430537	Tu1	226303995	GGTCACCCCTATTCAGCTGCGTCAGTGGCACGAGCCTTGTCTATTTTAAG[K]GATCGTGATCCAATCTTTACTAGCGGGTTTTGGTCAGAATTGTTCCATCT
AX-94917775	38.443	1A	255444321	7B	237486000	5A	415922893	Tu1	260582232	ACTCTGGACCCAGGCGGTTTGCAAGCACCTTACAGGCAATCTTGGCAATG[Y]TGTGCAGGAGACTCACCGGGCGGTAATCTCCAACTTTAGTGGCGTCCACC
AX-95069046	38.443	1A	282144295	1B	314130337	1D	219480095	Tu1	274586498	CTCGCTTACAGCAGTTACCATGTCAAA[Y]TTTTGAGTCTATTCCCCTGGGAGAAGGTACTGGTGTTGGAATGACGAAAGGGGCTGACACAGTGGAAATGCCA
AX-94629293	38.443	1A	252967142	2D	60047569	7D	589246565	Tu1	295120743	CAATTGGCTGCGCCATCATCTGCTCCGGTTGTGACGGGAATGCATAAGAC[R]CTGGGATAGCATCAACTGGCTCAATTGGCTGGCTCAAATCAATTTCGAGG
AX-94439447	38.443	1A	291673060					Tu1	300805486	ATTTCGGAATTGCCCTAATTGAGTAACATAACATGATAGATCAACCTGGG[M]AATACAAGAGTCCTGCAAGTTGCAACGTAGTCAAAGTATAATACAACTAT
AX-94713673	38.443	1A	303323029	1B	334089671	1D	239556672	Tu1	251750797	ATCAAATGCACGATGCTGCTTTATTATCAAAAGCATAAGCAAGTCTTCAG[R]TTCATCACCACCAAGCGAACAAAAATAACACAGCAAACTCGGAACATGTC
AX-94456521	38.443	1A	319818622	1B	363932007	1D	250140327	Tu1	315684693	TGAAGAAGGAACACAAGAAGCTGAAATTATGCAGGATACCCACTGTGAGA[R]TAAGCTGAGCACGCTTGAGAGTATCAGTGAAGATGACAAGATGATAAGTG
AX-94496406	40.571	1A	333221587	1B	369125686	1D	269354984	Tu1	332897478	GCCATGGCCGAGGCGACTTGGTCAGCCTCGGTGAACCCTTTACGGAGGAG[R]AAGTGTGAGACTGGTGCGTCGGTTGCTACGCGGGAAGGCGCCAGGCACGG
AX-94636953	40.989	1A	338178731	1B	349907273	1D	261741534	Tu1	535496196	GTTCCCATGAGCTGAGCTCCGAAGACATCGCTGTCCTTGACGACGAACTC[R]ACCTCAGCGGCCTCATGGCCAACAGGCACATTGAAGTTCTGCGCCCAAAC
AX-94775110	42.255	1A	350349393	1B	377902990	1D	278516729	Tu1	350097292	GGATTGCTTATAGTGGTTTGATAGGTCTGCGAGAAGCTGCTATAAGGGCA[Y]TGACTGGACTTGCCTGTATGGATGCTGACCTCGTGTGGCTTCTTCTGGCA
AX-94900631	48.457	1A	388437001	1B	418295483	1D	309081548	Tu1	384873065	TCATGTTCAACGAAGCAATTCTTCAGTGCCTCACTAATGTCCTCGTCAGG[R]GCAAACAAACGTGTTTGGCTATCATAATTCGGTTGAAGCACCCTCAAGCA
AX-94778336	57.076	1A	432230048	1B	450075078	1D	335074408	Tu1	430751481	TTTGTTAAGCAAGGTGCTATGGTTAAGCAAGTCGTTGGCAGTTCCCCTGT[Y]CATTTCCAGTCGAAGTATAAAGAAAGCATGGGCGAAGATAAGATTGTATT
AX-94619761	57.916	1A	442794282	1B	460764002	1D	343889191	Tu1	445282228	TGGGCTATGCTTATGTTTTGCGGCTGCTATGGATGGGAGCGGTTTTTGCG[R]TGGACATTCCCAGGCAAGATGCCAGCGTGGGAGAAGCGCCAGAAACAAGC
AX-94478936	58.757	1A	457811695	1B	479869286	1D	356928750	Tu1	459223146	TAGCACCCGCGCTGTCGACCGATCCATGTCCTCTACTAGTTCGAT[R]GGTTTGCTGGATAACCTACGTACGTCTACTTTATTACCACAGTACTGTATTGCGG
AX-94978926	59.175	1A	462636085	1B	486452649	1D	363804007	Tu1	462723596	ATGTTTAATTCTGTCGTCAAGGAACACAGATGTATAGGGTCAGCATTCAA[Y]AGCCAGTGCTACTGCTATCTGTGCGACAAATAGTTTGTTAGGGTGGAACC
AX-95154989	59.175	1A	471101947	1B	496008068	1D	371785769	Tu1	471524170	GTGAACACTGATTTCCAGGCTATGAGGATGTCGCCCATTGACCCGGCAAA[Y]AGGCTGCCGATTGGCCAGGAACTGACAAGAGGTCTTGGTGCTGGTGGGAA
AX-94498696	69.301	1A	493107973			1D	396016285	Tu1	490962284	CCAGGTCGGTTCGTTGGAGAAGTACTGGTGGTATTGACTTATCTGATAGT[R]GTGCTGTTTAGCATTCGACTTGGCGTGGTTCAGGAGCTTGCACGAGCTAG
AX-94518993	90.841	1A	517084001					Tu1	512319244	TCACCGAACGATTGCACCACTGTCACAACCTGCTTGACTGACAGCCTCGA[Y]GTAACCGATACAGGTTCATCTTGTTCACACCCATGTTCCCCATACAAACC
AX-94426657	92.536	1A	520918061	1B	575270950	1D	426181095	Tu1	516795878	TGTAAACAGCATGTTCATTTACGGAAGCCAAGATGAAGTGAGACGCTGCA[R]CCTTTCTTTCTTACCATAAGACCTCTACCGTTCATTTTGGTCGAAGACGA
AX-94403165	92.536	1A	522114869					Tu1	523126701	GCTGCACAAAAGAGATCCTACGGCTGGCACAA[S]ACTTCAAGACGAAAGTCACTCCACGGGCGGTCATCGCTCTTGAGAATTAACCTGCCTCCCCTAGTCAG
Chr2Au
AX-94382746	0	2A	3431344	2B	4471817	2D	7800393	Tu2	3875486	GAGGACGCGGCGGAGTTCAGGCCCGAGAGGTTCGAGAGGAACGACGCTAT[R]CATGTGGACTACAGCTCGGGGACACAAATGGAGTTCGTCCCATTCGGATT
AX-95121571	3.881					2D	12291839	Tu2	13047113	AAGTTCAAATTTCAACTGCATGCCTTATACGGTGTTGCCACTAGGTGCAG[Y]TGGTTCTTTCTCCTTAAGGTCATGCCAACCCTCATTTCCATGTCCAGCTC
AX-95158120	3.881	6A	7595978	2B	18819833	2D	12413152	Tu2	12547018	CACGACGACTGCGTCAAAATACTTCAACGTTGCAAGGAAGCCATCCCTGC[Y]AGAAATGCTGGAGGAAAGGTGATAATTATAGATATGGTAAGAGGATCTGC
AX-95080496	3.881	2A	13409095	2B	22317416			Tu2	13399471	TCTTACTACTTCCAGTGGGTATTTTTCAGTTTATTTTGTAATTGTGCCGC[Y]ATGTGTTAGCTGTAAATACCGATCTGTGATTTTGATTCTGATGATTTGTT
AX-94958686	3.881	2A	14065027	2B	21746235			Tu2	14032827	CACCAGACAAAATGATCTCGAAATGCTAAAATATGATAAATACACCGACC[Y]TGTACGAGTTTCGTGCCCTCTAGATGCTATCTTTCAAAGAGTCCCCTGAT
AX-94673034	3.881	2A	14889183						NO HIT	GGCAAGCTTCTTCCGGAGAAACCGGGGATGGAGAAAGCGCACATACAGAT[R]TTGCGGTATGCCGAGGAAAGCAATGTGATGTTTCTGGTCATAGGCTTTAG
AX-94945527	3.881	2A	14951570	2B	23188809	2D	12785941	Tu2	16401095	GTGTATATGGACTCAGAGTCACGATGAGTAATGAGAATAAGATGTTCAGT[W]CGTGCGTACAACATGCAGTCATTGTCCAATCCAGACAAGTTTTCTTGTGT
AX-94897568	3.881	2A	15099669			2D	12978317	Tu2	16643317	GTGCCGCAGCCCCTCAGTAAGGAGACTCCTGATTGGAGCTTCTTCAGCCA[Y]GCTATGAGGTCTGCGTCCACAAGTCCACAGTCAACATTTGAGTAAATTAA
AX-94511082	3.881					2D	13427748		NO HIT	ATTCAAATACTAAGGCTGGATGGCTTATAAACAGCAAGAACATACCACAC[K]CTGACTAACATCGTGAAATCACGTCACCGATATAGCGATACATGGTTACA
AX-95205778	3.881	2A	15962812	2B	24725340	2D	13773230	Tu2	17307458	GAAGTCTCTCCCTGAACCAAAGGAAAAGGAGACTTAGAGTTCCAGGTGTA[Y]TTTCTGTTGGCCGTGTTCCTTCTCCATGTTGCTCACCATGTCGTTCGTTC
AX-94443062	3.881	2A	16078561	Un	327054288	2D	86496366	Tu2	18253511	ATGTTTAGAGAAACAAAGGTAAACTATTAAGCGATGTTCCGCCATCACTC[Y]ACTGTCAAACTGAGGACGCGTTGAGAGTATTGTCGAGGCGCAGAATTCTT
AX-94649867	3.881	2A	16523590					Tu2	17737595	TCATCTCTTGAAAATATTTTGAAGTCAGCTAGTCTTCCAACGGTCAGATC[W]ATTTTCATTGAAGAGTGTTTAGGATTGTCATCTATGCGAGGTGAAAGATT
AX-94427562	3.881	2A	16523918					Tu2	17737267	CAAGTTCAGATACAGCTCTCCTTGGAGATGCATGTTTTTCAACACTTCCA[Y]AGATATTCCCCAAAAGTTAGTGTAGTTCCTGCCATGAACAAAAGTTCTTA
AX-94451874	3.881	2A	16525579					Tu2	17735606	CCTTTGAATCAGGAAAAGAGCTTGTCTCAGGTCTGACTGACCTATCAAAG[Y]GTGGAGTTTCTTGCTGCAAATCCGTAGCATTCAACTTACTCATCAAATGT
AX-94601079	3.881	2A	16525614					Tu2	17735571	ACTGACCTATCAAAGCGTGGAGTTTCTTGCTGCAAATCCGTAGCATTCAA[Y]TTACTCATCAAATGTTCAGCTCTTTGTTGTAAAAGCTTCACTTTGTCAAA
AX-94547727	5.569	2A	17440773	2B	27182681	2D	16116358	Tu2	18423307	TGCTCTGACTGGGATTTCTTTGGCAACTGCTCCTTTGATTACGTTAGCGA[S]TTCTTCGATGTTGAAGACATTGTTTTGTACCGATAGCATGTTTCGCTTGT
AX-86165475	5.569	2A	17656711	2B	27380480	2D	15881620	Tu2	18496817	TTGTTATCCTTCTTTACCCGATACTCCAAATACTTCGTTAGAATATCATCMACAGTGGGCGATCGAGGTAGTTTTACAAGCTTACCCAGCTGCGTGACAAA
AX-94793912	7.257			2B	27927843			Tu2	16166492	GAGATCTTCTTTCACATATTCCATCTCCTTGTCCACATAGACGCAGGCGG[K]GCTCTTGGTTCCCTGCCCTCCACCAAACCACATGACCGAGAAGGACACGA
AX-94450144	7.257	2A	22571666	2B	34788306	2D	21543260	Tu2	23784023	GGGTTTGTCTGCCCAATGTGGGATTCCCACAAGAGGAACACCACTAACAA[Y]TGCCTCCAATGTCGAGTTCCATCCGCAGTGGGTAACAAAACAACCAACAT
AX-95204758	18.362			2B	41382423			Tu2	27576048	ACGTCGCCCCATGGTGCCAATCCCCCAATCTACAGGAGCGTCACCATCGA[R]GACTTCATCGCGCACTTTTACAAGAAAGGCAGCGAGAATCGTCCCAGGCT
AX-94508821	21.355	2A	32129592	1D	143318298	3D	121692428	Tu2	30915287	GCAAGCTGGTCTTCCTCATCCAAATCCAAAATCACACCCGTGTTGTATAT[S]ATGCCTATATATGGTTGCTTCTCCCATGACCTTTCCATCATTCTCATCCT
AX-95225397	21.355	2A	32129686	1D	143318205	3D	121692335	Tu2	30915381	TCATCCTCATCTACCCGTCCCTCTTCATCCGTGCATATTTGCTCTTCCTC[Y]TGTTGTACTACTTCAGATCCACCTCCATCAACAAAGCCAGAACTAAAGGA
AX-94929700	39.1	2A	49179878	2B	72819241	2D	45683769	Tu2	43575029	AAGTCACACTGACCGGCTCTGATCAATACAGAATATTTGCCTCTGTTTCG[W]TCCTTTCGTCTAAAGGCTCCATTCGGGGTGTTTTCAGTCAGGGGGTNCGA
AX-95250028	39.516	2A	51514086	2B	76884227	2D	49204994	Tu2	45689927	GATTCTTCCATCCCGACTTACTAGCCGTCATACCGATCAGCGTTCCAACC[M]CAGAGGCTTCTCTGCGTGCTTTACCATGCTGAACTAAAATCATAGCCCGG
AX-94448733	60.311	2A	77338767	2B	118326124			Tu2	71871352	ATGCATCCTTTCTGAATGTATCTTTTCGCCCTTCCTCAAATTATGTGCAT[R]TTGTATGTTTTGCCTGAATGTAATATAATACAAAGGGCGATACGTCTAAC
AX-94433355	61.572	2A	79163842	2B	121991469	2D	78692732	Tu2	73283237	AACGAGGTACATTAGTTACATACTTCCATGCCACTGCCACAGTAGATACG[M]CGAGTACGGTTTTCATACGTGCAAATACTAACACAGTTGTTATTTAGACA
AX-95247903	62.832	2A	81784441	2B	133169236	2D	81326156	Tu2	76915967	CCTGACCGGTACAAGGTTTGATCAAGCAGAAATGAAACCGCAGGATGTGT[Y]CACAGAAATTGGTTTGTGCTAGGTCAGCCTTGTTGATTCCTAGTCGTCTG
AX-94632739	70.921	2A	119088544	2B	168622406	2D	117840545	Tu2	114264512	TGTCTGGTGATCTTTATGCCCGAGTCTTTCATCAGCCGCAGCGCCCTGTC[R]AACGAACTGATCCTATCCCCCACATTGCTTCCCAGAGCGATCACAATCTC
AX-95192332	72.609	2A	123514542	2B	172890361	2D	120092830	Tu2	125861010	TGCTGCAAAGGGCTACTTGCTTCTACGGCACTACTCTGACTCCTGAAGAC[R]TGTCATGAGAAATTTCCCACTACTCTGATTCCTGAAGCTAATGTCCTCAT
AX-95259382	72.609	2A	127205331	2B	175637055			Tu2	129564355	CTAATATTTGTAATGTGAGATTTAGCACTTGCTGTATAGTTTGGAGTTTG[K]ACTGTCTTTAGAGATGCTTGCCTGGCTCACTCAAACTTACATTGTTGGGA
AX-95176938	75.602	2A	158073333	2B	200897193	2D	143221976	Tu2	153119629	GACATGAGCTTGTCGAGGTNGCCGTCGTCCGATATGCGGCATATGCATAT[R]GGAGCGTTTACGAAGAGTGACCTCAGGCCGTCACAGCACTTGCCTTGGTT
AX-94538364	75.602	2A	156622873	2B	205647071	2D	145396231	Tu2	162339230	AAGAAGGACGTTAGCTGGCGGGAACTGATGATCTGCTGTCAAAGTCTGCA[M]AAGCAGACATTCGCAACTTGCGAAGTGTAGCTAAAGATTCGTTGATACTG
AX-94629399	79.933	2A	203311259	1D	90516967	7D	60108525	Tu2	271752777	AATCCCTGGACTCGTCTTTGAGTATGTATCGTGCGGAGGAGTGTTAATTA[Y]GCCTTACATGTTTGCTTTGCTTATAATGCTTCTTGCAATTTAGCAGAAAT
AX-94896111	79.933	2A	203457481	2B	246000862	2D	189673039	Tu2	204137944	TACTCAGGCATGCACACAGATCCATATCCAGGAGTTTCACATTCTACCAG[Y]AGATCACCTATGTCACCCAACGAAGTTTCGATTACTGAACTTGAGCCGAG
AX-94756243	81.621	2A	207055528	2B	249264886	2D	193119912	Tu2	207070523	GTGATCGGCGATGGGACAGAAAAGATTGTGTCAGGACATACTACTGGTTCC[R]GACTGTGTTGGAATGCAACGCATGCACCGTGAACTGGCGGCAGGCCAGG
AX-94485513	82.038	2A	258347493	2B	281875119	2D	239974724	Tu2	251089486	AGCGAGAAGTTTGAGAACCTTACTGAACAAGAACTTTGCTTAAAAGAATC[Y]TTAGCGGCCTATCGAAATGCTGCTGACGCTGCCAGTAATATCCAAGCTGC
AX-95106097	82.038			2B	339108654			Tu2	302854706	GGTAGATAATCTCTTCCCACGTGGTTCTTTTAATCTAGAATAGCAGCCAT[R]GAATATTATTGTTTAATCAGGCAACAAGTGCTTCACGACTTGCTTCTAAT
AX-94638064	82.038	2A	306134021	1B	668221696	5D	310275095	Tu2	354536228	TCACCCCTCAAGGCTCTCGCGTACTTGCAGGTAACATCCTATCCTGGCCG[Y]GCACGAGTAAGTTCACAGGTGATAAAACTACGTTAGTGATTTCTCTGTTT
AX-95072207	82.038	2A	240803590	2B	23050576	4B	4941790	Tu2	364845303	AATTTGATGTGGGCCGGCCAATTCACCTTCTCGCCACATGTAGGTGTCAG[Y]GAGTGGTTGTGATTCACCCTGTGTTCGGTTATGTACCACCCATTGCGTGT
AX-94573816	82.875	2A	384993812	7B	157177428	5B	136738727	Tu2	382191278	ATTAGAAAGCTCTGCCTGGCGCATGAAGGGGAGACAATTTCGGAAGAAGC[R]CTTAGGATGTACGTCGACCTATTTTCCCGTCCGCTTTCGGACGTGCACAT
AX-94528590	82.875	2A	415264832			2D	317876369		NO HIT	TGGTAACCCAGCAAAGAAAGGAAATGATGAGTTGGAGCGTCTAAGGGAGC[K]AGTAGCACAGTTACAGAATGAACTGGAAGCAATGGAGTCGCTCAATCGTG
AX-94443516	82.875	2A	423841214						NO HIT	ACAAGATGAGAAAGAGTGTCGCAAATACATTTGAGAGAAAACGAGGAACG[S]AGTGCCATTGTCATGGGAGTCACTACTGAGCTGCGCTGGGCTGGGCGCAG
AX-86165901	82.875	2A	492518272	2B	433541878	2D	365365748	Tu2	428546019	AGTACCTTTACCATTTCTGGTTTCACGCTCTAAGCATTTTTTACCTAATG[Y]CAGTCGATAAATGAACAACATACATGCCTGTCTCTTTCAGATATTTCATG
AX-94507961	82.875	2A	485791545	2B	429147074	2D	360488707	Tu2	431570928	TGTCAAAAACTGAGCTCATTGCTATATTTTTGTCATCAAATGACGAATGC[Y]GCACTGCTTACTATAGCTAAGAACTGCCCAAATTTCACGCGATTCAGACT
AX-94412799	83.292	2A	475457175	2B	423667504	2D	355685953	Tu2	435186182	CAACTCCGTGATCTAATATCAGATATATCAATGTGGCAAAGCCCTTGCTC[R]GTGTGAGTTGTTGCTGCTAATCAATTCTTACAAGTCCCAAGGGATCTGAC
AX-94853843	83.292	2A	451811848	2B	407237700	2D	342101128	Tu2	453307603	GAAGTACAGCACAAATATTTGCATCAGATGACAGGAAATG[R]AAGATTAAATCCAATGTCCCAGTTTGCACTTCTAGATTCGTAGAGAGCAGAGATCCTTTG
AX-94727794	83.292	2A	474880320					Tu2	462282893	AAAACAAAATACGCCAAAGATGGATTTTTACCTTCCATGGAACATTAGCC[R]CTGATGGATTCCTAGTGTGGGATTCAAGAGTTCACCGGGTCACGATGCAT
AX-94504198	83.292	2A	497451359	2B	436038250	2D	367238122	Tu2	469422238	GAAGGTGCTGGCTCAATGTATTGTATTCGAGCATGAATGAACGGATGAAC[M]AGTGAAGTAGTTATCATTGACACACAAGTGAGAATGTAGCCGATCTTGGG
AX-94394887	83.292	2A	489969462	2B	432142238	2D	363982639	Tu2	482358116	GTTGGAGCAGTCACGTGTGGATAATTCTGTGTTGAAGTTGGCTGGATACA[K]GAAACTTGTAAGCTTGGTAAAAACCATCGTGCCTGAATTTCTTATAGTAC
AX-95115213	83.292	2A	461978341	2B	413865471	2D	348285452	Tu2	485626272	GTTTTGAGGATTACTGGAGGCAGATCTTCATATCTAATGAAGTTGCAGAC[Y]AGTTATGATTGTCAATGCCATTTTCGCTCTTAAGAAATGTTGCTAGTGTT
AX-94396146	90.895	2A	526739610	2B	461570500	2D	390414532	Tu2	510300068	CATTGTTTAAGAAAGGCTGGCTATATCTATCTGAAATTCTGCAACACATA[Y]TGCTCTGCTCATTTCATTTTCGCCTTTCAACCTTTGTCAGATACTAATAT
AX-94730121	90.895	2A	527918443	2B	462891353	2D	391276878	Tu2	511696300	GGCTCAATTCATAAGTTACTTAGGGAGTATGGCCCTTTTAAGGAACCTGT[S]ATTCGCAGTTATACTTGTCAAATTCTCGCTGGTCTTGCGTATTTGCATGC
AX-94911937	91.312	2A	529635629	6B	519461182	4B	377810668	Tu2	513278358	ATGTCAGACAACACAAATGATGATGATATGCCTGATGTTGGAGAAGAGTC[Y]GAGGAGGATGGAAATGCATTGAAGGAGGTCAAGGTTTCACCTAAGGATGG
AX-94678573	91.312	2A	542659266			2D	404399552	Tu2	523036025	ATATTTCAATAGTTTGAGGTTGTAATTCAAGCGGTTCTAGAGTTTCAGGG[K]TGAGATGAAAATGCAAACAAGCAGAAAAGCAAAGCGCCTGTTTCGCTCTA
AX-94462589	91.312	2A	532856718	7D	216786550	2D	394789242	Tu2	524651506	TCCGAGCCTTGTGTTCCGCAGGGTGCGTGCCTGATTTTAGTTTTTCTTAA[Y]AAATTGTCGTAGGGGCTAGTCCGTATGGGTCTCCTTTTTTGTTGTATCTT
AX-94501526	92.573	2A	552307847	3A	705928744			Tu2	530789974	TATGTGTGGTAAATATAGATTGAGCATCCCATTCATTTGCGGGATACGTT[Y]TCCTTAGTCCATTGAGTTACCTCTATTGCATATTTTAAAAATGGCTTCTT
AX-94562168	96.008	2A	578767510	2B	512910906	2D	433864853		NO HIT	ACAACACCTCGTTGCTAACGAGGAGGGTTAAACTACACGACCAAGACGAG[R]GAAATGACTCTTCTCATCTCAACTTGGCTCCTCTACGGTTGTACCTCGCC
AX-94470139	96.424	2A	583170622					Tu2	563721040	GGGCGAGACATCGCTTTGCCCGACAAGGGATCCGCCTTCGAGCTTGTGCA[R]CGTCCATAGGATAGCAAATTGTGCACGACGCTAATCGAAGCCGGTGGGTT
AX-94603408	96.424	2A	583170669					Tu2	563721087	GGCGAACGATTGGCAGAAGCTACCAAACCGGCA[R]CAGGGGCAATGGTGGGCGAGACATCGCTTTGCCCGACAAGGGATCCGCCTTCGAGCTTGTGCAACGT
AX-95188312	98.543	2A	597503944	2B	532091432	2D	451971909	Tu2	571915031	TCTTTAACAATCTCAGGGTGGTAATCAGGACTCTGCAGCTCCTCGATACA[Y]TGTTGTGCTTCATCCAAAATACGGATACCAAAATACTCCTCAAGAAGAGA
AX-94636452	98.543	2A	598160990	2B	531468083	2D	451289180	Tu2	573416066	NNNNNNNNNNNNNNNGGGTAAAAATAATGCTTATTTATAAGTTCGAGACA[R]CTTTTCCCCAGAAGTACGCTCATTGTGGCAGACGCAGCAAACCACCTAGA
AX-94697318	98.543	2A	599166659	2B	530412411	2D	450371783	Tu2	574142383	CGGGTGGAGTAGCTCCATGGGATGGTTTGTGAGCAAGAACTCCAGACAGC[R]TGACTTGTCCGCCTCACTCAGCTTCGAGTATGCATTTACAACATCATCCA
AX-94680402	98.543	2A	593502125	2B	529108148	2D	449512002	Tu2	574978571	CGATGTTGTCAGCCGATGTCAAGGTGATGCAAGTGGGGAGAGTGTGTAAT[R]CAGTGGCTCGTCAACTTGCTCAGTTAGCTAGAGAAGAAATAAACTTGCAC
AX-95131782	98.543	2A	602134013	2B	539810271	2D	458917069	Tu2	576944620	GCTTGGATGGAAGTAATCGCTTCTCAAGGGCAGTCCTTGCTATCTGTTGA[Y]ATCTCTTGCTCTGATGTGACTGATAGTGGATTGAATCTTCTCAAAGATTG
AX-94394578	98.543	2A	592693142	2B	527875249	2D	448122949	Tu2	582444331	GCGAGGTGAGCTACCACAAACAACGCCGTTCGGTAGTAGCCGCTCCAAAT[K]AATTCTCTCTATGCGAATCGCCGCCTCCATGTAGGATGTAGGGTGATGAT
AX-94422720	100.231	2A	608611017	2B	546942036	2D	468766226	Tu2	590954732	TACCTGAGTTTGAGGTTCTGTATCCTTGCGCGCCATCTATCCTATTTGGG[K]TACCAGCAATTATACAATCAGCAATGGCTGTGGACACTATATGAACTGTT
AX-94409581	100.231	2A	610179792	6A	17964807	4A	625649759	Tu2	592047469	TGTCGTTGCCTCGTGTGTTTCCGGTCTCTTCTGCTTTATGAATGAGATGG[Y]TGTCATCTCCCATTCACGTTGGCCGCTTGGTCATGTGCGACTGTATAGAT
AX-95169440	107.354	2A	631538167	2B	570895863	2D	485990868	TuUngrouped_contig_5309	2633	CAACGCCATGATGATGGCTCCCTTTGTTTCCCACATTGGCATGAATCTGG[Y]ACTCGGTATGGCTGCATAACCCAAGTAGAAGAACAGCCCAGAGAGGATGA
AX-94818415	107.354	2A	634105052	2B	574712631	2D	490570292	Tu2	616244400	TATCTAGAAGTCTATTGGATATGGTAGTTTTTTCGAGTAATTGGCAATAG[Y]GCCGCCTTTCAATTACAAGAACATGGTTGTTTTACAACTGCTTTTACAAG
AX-94423228	112.599	2A	672842318	2B	625933331	2D	528083320	Tu2	655264728	TACAATGGGAATACATATCATCTGATTTCAAAGAACTGCAACCATTTTAC[R]GATGATGTCTGTAAGAACATAACCAAAAAACCAGCCCCTGGATGGGTAAA
AX-94427576	117.844	2A	685037275	2B	647109523	2D	542150761	Tu2	663018939	GATTGGTGAGAGTGCTTCGGCTCTTTGGGCTCGGGGTAGCACGTACGCCG[Y]ACGTCTTTTTCACCGTTTCCACGGTCCTGTAAATATGACAGATGCTTGTA
AX-94539132	124.491	2A	706919815	2B	680063775	2D	567052087	Tu2	682567933	TGTATTACGTTGATGGTACGTACATGTAGCACACAAAGGAGCGAAAAATA[S]AGACATGGACTGAGAGGAAATACAGATACAGACACTCATTAAGGAACGTG
AX-94700994	127.483	2A	711637065	2B	687469297	2D	572360586	Tu2	685596779	TATCTATTGTCACGTCGGGTTTGCCGGCCATTCATTCCAGTGATTGCTCG[R]GGAAGGCAGCGTGGGAGCAATCTATCCTTGCTCTTCCTCGTGGCATGAGG
AX-94453516	142.354	2A	739876935	2B	741749857			Tu2	716925996	GTTCCATGACGAGGGATATCAAATCTTTCTGGTCACAATATGATCCGGGT[K]GTTATGGCACTAACATGTGCCCAATCCATAGAGTCCCAGAACACATTCGT
AX-95232561	147.14	2A	745656548	2B	750002900	2D	615592512	Tu2	723539628	TACCTGCACGAAGACATGGATTTCCAGATAATTTTCCGGGACCTGAAGAC[R]TCAAACATTCTGCTGGATGAAGACTGGAACGCCAAGCTGTCAGACTTCGG
Chr3Au
AX-94785800	0	3A	24056480	3B	17552227	3D	13145278	Tu3	19312673	TATGTCAAGCTCAGTCCCGGTGAAGCAATTTATATCGGTGCCAATGAACC[R]CACGCATACCTGTCCGGGGAATGCATCGAGTGTATGGCTACTTCAGACAA
AX-94431861	7.123	3A	35413983					Tu3	32850664	CGCAAAACAAGATTCACCTGCAGTGGCACAACGGAGATGATGTTGGGGAA[Y]TGAGCTAGGCCAATTGTTATGTGACCTGCGATTCGTTGCACAGCCTGCAG
AX-94831522	13.298	3A	36490942	3B	43013081	3D	26453694	Tu3	33660732	GTTCACCTTTTCTTCATATGAGCTGCAGTGACATGCATGACGCTATTAAT[Y]GAAGTGGCAGAGATTACACAGGCGAACTTTCTGTGCTTGCCAATATGAAC
AX-95150564	27.613	3A	75030360	3B	105604566	3D	64477210		NO HIT	GAGTGAGATGGTTGCTAATTTGAGGATGCAAGATTACACTGTTGAGGATG[R]GCATATTGATGTTCTTCGGATACTGCAGGTCGGGGACAACGCCGAGTTTG
AX-94434800	28.03	3A	83722210					Tu3	76885172	ACAGTGGCACTTGTGATCTGCACCTCAGTGTTGCTCGTGTCCTCCTGAAC[Y]GGACCAATGCTCTTGTCCAAAATCTGTTGGATAGCTCTGGGATCGTGCTT
AX-94410592	28.03					3D	84673362		NO HIT	GGTGATTTGCTTTATACAAGGAAGGGGCTCTTCTTGGATAAAACATCATA[S]GGACATGATGAAGGAAGCTGCTGATCATTGGTAATGAAACTGGCAATGGT
AX-94542938	35.634	3A	112953496	3B	168257053	3D	116035163		NO HIT	GTCCTCATATTTCTAGCTGCAATACTGCTCATTAGCCTGATTATTGCGCC[R]ATCTTGGTCTGTCGGAAGCGAGGGGATGGATCAATAGCCCCCTGGAAAGC
AX-95220838	42.281	3A	150722709	3B	192251220	3D	135379910	Tu3	152646929	ACCTTAATGGCACTACCCAAGCTCAGCCTGGACTAAAAGCAGAAACTAAC[R]GTAATCTCAATGGTTCACAGTTCTTTGACATGAACAGTCAGAATAGCCAT
AX-95245143	42.281	3A	155059111	3B	199112816	3D	137002711	Tu3	169865353	TACTAATACTACTACACAACGGGTTTACTGTTTGCTCCTCTTGTTTGGGA[M]AATATAAGGCGGCTAAAAAGGTAATCTCGCTTGAATAGGCGGATGCGGGA
AX-94783547	42.698	3A	159996134	4D	375117051	3D	141647813	Tu3	163914296	TGTCAGTTGGCACCCCAGTTACGGGACATTGGCATCCAATCATTTGAATC[R]GAGCTCTTGACATCCATCGATTTAATTGAGCCGGCAGCTGCGACGTTCAT
AX-94502353	42.698	3A	159996182	3B	202246002	4D	375117099	Tu3	163914344	TCAATCAGCCTGAATGAGAGCATTTTACCAGTAAGATTTGCTAGAGAGTG[Y]CAGTTGGCACCCCAGTTACGGGACATTGGCATCCAATCATTTGAATCAGA
AX-94852544	42.698	3A	165328832	3B	213171018	3D	147830674	Tu3	177385819	GCTGGAGAGCACGGAACCTACGCCCTGATTTACTGGCACAAGTAGTATGT[Y]TAGGGTGAATTGTAGGCTCATTTTTTGGGTACCTGATGGGTGGCTGACAG
AX-94677134	42.698	3A	199694959	3B	241871094	3D	168189148	Tu3	202218286	TACTGCATCCGTGGAATCCTGTGGGCTGTTGACTATGAGCTGCCCAAGAA[Y]GTGGTTGCTCTCCATCACCCTGTCAAGAACCAAGCCGGTGTGCTCCTTGC
AX-95193187	43.534	3A	234214651	3B	260823305	3D	183739346	Tu3	222329365	GTGTAGGTTGGTCAGATGTTTCTGCTTCTTCAGGGAGTATATTTATGTAA[R]ACATGCAGCGAGTTTTCTAAGCACTGGTCAAGTTTGGAAAGTGGCATGGT
AX-95130498	43.951	3A	328929238	3B	305200450	3D	254370023	TuUngrouped_contig_5585	7616	AATGGCAGGTGGCATATGGTTCATCACCATAGCTCACTCATGGCTGACCC[R]GCGCCACATAATCTGTTTGGCTGAATTCAACTACAAAGTTTCATCCGCAA
AX-94586703	43.951			3B	360365511	3D	272515782	Tu3	268484062	TTGAAGTATTCCAAAGGTTTTGCCTGCTCAGAAAGCAAGATTGCAGAATG[Y]GAGGGAAGAGGGTCGATGTGTGTATGAATGTTGCGGTGAAGCGACCTTCT
AX-94428990	43.951	3A	388602544	3B	384991786	3D	292381575	Tu3	394046104	ACTCTCATAGTATGTACACTTGTAGTATTACACTGATCGCCTACCGTGGA[R]CTTGGAGATCTGCTTCTCGACCTTCCTCGCACAGTCATGGCAGTGCATCG
AX-94411566	44.368	3A	401027051	3B	394888284	3D	300878390	Tu3	376691803	TACAATATACTGGCGGACTATCTGGCCCAGGAGCACCAAGATCTTTATAG[R]GACATACCATCATTCATCATGGACTGGAACTGGCGTAAGAATAGGATAGG
AX-95630046	44.368	3A	430790403	3B	416344667	3D	319729605	Tu3	433944437	CGACTCAACAAAAACAACGTGTTTGGATGTTCCTAACCAACAGCATACAT[R]AAAACTGCTACATACTACTAGTCCCAGTGCATATTCAGCTCACTGAGCTC
AX-94928542	44.368	3A	443817418	3B	424927528	3D	328982726	Tu3	440661327	GAAAATGGACTTAACACAAGAGAATAATGAGGACACAGAAATGCTTGACC[R]TATTCCACTGAAGGAATTGACGGTGAGTAACCCTGTCTTGCACCACCGTA
AX-95216392	44.368	3A	461791015	3B	439023009	3D	341511407	Tu3	463006425	CTGTTATAAGAGGTTCTAGCTTCTGTCAACCTGATGGCAACTATACATCT[S]GTGCAACATATAAATGGCTTATGTCACAGGGATGCGATTATCGTGGGCCA
AX-94496167	47.36	3A	477428563	3B	461463966	3D	358185046	Tu3	477769523	TCCTTGGAGTGAAGAAGGATTGGAAGCCGAGGTTGATGTCCATTTCGCTG[R]TGCTGATGCCGGCAGGTGGTACGACCTTGTGCGGAATGTGGATGGAGCGC
AX-94731499	49.048	3A	516555127	3B	520975458	3D	397145837	Tu3	518881960	ACCCCTGCATGCCCAGTCAAGGACATGTTTGAAGAAAAGGCAAATGAGGT[Y]GTTGCAGCACTTCCATGGGTCAAGAAGGTCAATGTTACAATGTCTGCACA
AX-95163612	55.223	3A	575409017	3B	571181463	3D	437363139	Tu3	569130596	TGTGTTTTGTTGCAGCGCCACCAGAATTCATCTTGTTTTGCTGCAGCGGA[Y]GTGGTTTAATGTATTCTTGGCATCTGTAACAAGTTCCATTCCCCACTTTA
AX-94636269	56.911	3A	589600177	3B	586917823	3D	448430765	Tu3	580801313	TAGAGGGCTTAACTCCTGCGTTGGATGCTGGATCTTATTACTTTGGGCTT[Y]GTTAGTTAGCTGTTTGCTGCGTTTTTCGTTTGTGTTTGTAGTTCTCATGA
AX-94415137	64.034	3A	608381589	3B	617187252	3D	465082352	Tu3	599942004	ATCAATAAATACAATACTAGGTGCACATTCCCGAGCTTCTTGAAATAAGC[Y]TCTCACCCTGGATGGTCCAACACCAACAAACATTTCCAAGAAGTCTGAAC
AX-94598825	69.279	3A	625533016	3B	643418455	3D	482603046	Tu3	624053807	CCCCACTCCACCAGTCCACACCGCAGCAGCACTCCAGTGAGCTCGAAACC[K]AGAGGAGGAAGCGATACAGTACTACAGGCAACCATGGAGGTGGTGACCGG
AX-94485226	69.696	3A	638010116	2B	663786913	3D	603459431	Tu3	628489123	AGCACAAGTCCATGCAAGTGTCATGCATTCGTACTTAATTTTCTAATCAT[Y]GTTACCTACTGAAATGAATATGCATCAACAACAACATTCGATTGTTTGCT
AX-94743140	73.131	3A	646125802	3B	669523404	3D	508388441		NO HIT	GTCCTCTCGCTGCCCATCAGCTTCGCGCCCTTCGAGTCGCTCATATTCAC[R]TCCATCATGGTTCCCCAGGCCAGCTTCATCGGCCACCTGTCGGGGATCAT
AX-94525582	77.012	3A	656104918					Tu3	643929304	ATCCTAGGCAGGCGAGTAGGAGGGGGTCTAGTCTACCTGCGCGCGTGTAA[R]CCTGTAACTTATTACAGTATGTGGTAGATCTTGCTTATAGTCCGGGGCCG
AX-95235286	77.429	3A	659935889	3B	692516170	3D	525733421	Tu3	648903496	CCATACTGCAGACTTTTTTCATCTTTGGAAGGCAAGGAATCAGGAAGTAT[R]GAATTGCCATATGGCCCCTTTTCACTATTATACTCTTGTCTCCCTGCTAT
AX-94794743	78.689	3A	669524857	3B	704042134	3D	533676600	Tu3	678401547	AGTGAAACTTCTAGAATGTCTTATGTGACAGGCAATATTGGCCCTTCGTC[R]TCTGGTGCAGGCATGGTTCCTCTGAACGCCAACATGGGGGAAGCTCCTGA
AX-94949614	85.336	3A	676238079			3D	541188966	Tu3	666320544	GACCATACATCAAAGCTTCATACTCGGCCTCGTTGTTTGAGGGTGTAAAC[K]GACTTTGGGGCACGCAACTGAGTTTATTGCCTTTTCGGGAAATCAAAACC
AX-94571633	85.336	3A	682976704	3B	721527197	3D	546256175	Tu3	670691475	ATCGACCACGGCACAGTTGCTAGGACAATCGACGCTAACGTGTCAGAAGC[Y]GAGGGCATATACAGTGCCCTGGAGAAGCTGGGCATCGACTGGGAAGAGGT
AX-86179203	89.668	3A	697558493	3B	748019645	3D	562337720		NO HIT	GGTAGACAGGCAGTGTCAATTATGATGGCATATACTAGATGTGTAAACTG[R]ATGTACAAGAGGAGAAAATGATTGGTGTGACTACATATGTTTGGGCTGTT
AX-95158489	93.103	3A	710274885	3B	763196225	3D	575136466	Tu3	699171797	GTCATCATTTCCCTTGCAAAGGGGATAGAAGCCTCCTTGGACCCAATTCC[K]CGTATCATCACGCCTACACAAATGATCAGCTCCGCAGCTGGCGTTCCAAC
AX-94578210	93.103	3A	710830715					Tu3	699451747	ATCTCACACTATTATCACTGGTGCACATCTCTTCATAGAAGAAACCCAGA[S]CAACCTAAAAGTAGTAGAGCAAGGCATAGAGAACTTTTGGTTTCCTCGAG
AX-94669658	95.656	3A	715144357	4A	728714495	5D	109576901	Tu3	703735323	TATTAGGTGTATCGATCTGCATCATCTCCATCATCCGGGTCGTCCTCATG[S]GATCCGTGGGATAGTTATTGGGCGTAATGATCGGTGATGCCATGGTGCGT
AX-95111068	107.809	3A	734008197				604374317	Tu3	730078911	CCCTGGTGAAGACGAACACAGAGCTCTGTTCCAGTTCTCCCTAATATTTG[K]CTTGTGCTCGGAAATTTTCCCTGTTTTACTCGTGTGTGGACGAGGTTAGT
AX-89326853	108.226	3A	737800616	3B	813967926			Tu3	733898052	TAGGTCCCTCAGCTGTTTTATATCATAACCTTCTTGTAGGTTGCTTACTT[Y]GAAGTCTCTTAGAGTGTGGAGTGATATAAGCCCGCCTATGTTAGGAAGTT
AX-94886901	108.642	3A	749280397	3B	823434141	3D	613628938	TuUngrouped_contig_4542	1178	AAAAGGAAAGACTGGTACAAGATCCTGGGCATCTCAAAGACAGCATCGGC[Y]GCGGACATCAAGCGCGCGTACAAGAGGCTGGCGCTGCAGTGGCACCCGGA
Chr4Au
AX-94561738	0	4A	591875895	4B	20744888	4D	10989121	Tu4	13854347	AAGCCACTTGTGGATTCAGTCATCATAAATTTCAGGGGTTCCTATTGGCT[S]CTTGGGTCAGATTTAAGTTCTTATGGTGCGAAGCAGAATGGAGAGCTCAG
AX-94853868	3.881	4A	589605112	4B	23406329	4D	12702020	Tu4	15908168	CTCCATCAGCAAAAGCAAGCGGTGGAGCATTTGGAAAAGCTAAAGGTTGA[Y]TTGGAGACTGAACTCAAGGGTTATATGGATGACAACCATGTACTGAAGAG
AX-94797674	3.881	4A	589604998	4B	23406215	4D	12701906	Tu4	15908054	GCTCTTAACGCCAAAATTGGAGCTGAGGTGTCTCTCAGGGAAGAAAAGGA[R]AAGTTACTAGGTGCTCTTAATGAAGCAAACTGTGCCCTTTCCGAGAGTAA
AX-94545917	3.881	4A	585458309	4B	25834875	4D	15353874		NO HIT	TGCCTGAGGTGATTGGCCCTGTCGGTGGTCATTTGGCTGGGTGGAGGCTGAACCCTTCCTGT[Y]AATTGTTTCCGAGTACTGTCACTATGTAATCGCAATAC
AX-94678384	3.881	4A	584273259	4B	28072389	4D	16234679	Tu4	20068640	TTCAGGAACAGCTCCCTCGTTTTGACACTCAGCAGGTCAGGGATGATGTG[M]ACAAGCATCAAAGCCGTCGCGCAGGAAACGACGGCCGTCGAAACCTTGGC
AX-94568929	3.881	5B	86130168	4B	299459567	4D	21151109	Tu4	24424007	TAAGAAAGAAGATTCCTACTATCAGTGTATGGATATGGCCAGAAGAAACT[R]CTCCTGCCATTGGTTGACAATCGATGTTCAACGAAATTTCTCCTGCCGTT
AX-94886021	4.298	4A	580735214	4B	32897433	4D	21775994	Tu4	22839436	AAGCCCCAGCTGAACCTTGACTTCGACATGGCGGACTTCGATGATCAGAG[Y]ACCGCGGCGCCTGCGCCGGAGCAAGAGTTAGAGGACAGGAAAAGGAAGCG
AX-94825513	6.852	4A	573889063	4B	41780961	4D	29326339	Tu4	32091726	GCATCAGCAAATGAACCTTCATGTCCAGGGAAGTTACCAACAGCCTCGAA[Y]GCAGATTTCAGGATATCAATAGCATCATTTGATGCATTTTCACCAGAAAT
AX-94397930	6.852	4A	570466203	4B	46621427	4D	32236740	Tu4	35160017	TGGCACAACTGTGTTCTCTTCATGTTCTCGAATAATCTTGTTCGGCCTAG[Y]AATTATTAAAACGCAGACCTGCAACACGGCCGGGTTGCTTTGCTTCTAAA
AX-94680920	8.54	1A	81721799	7B	159156385			TuUngrouped_contig_5004	7221	TGCTGGTCGATTTCTTGCTTTGCGTACAGTTCACCAGCGGATTATGGGTAAGAA[Y]GGACTAAAGAAGGATGATGTTGGAGATCTGAAAATAATTTTTGGTT
AX-94518497	8.54	4A	546447121	7B	182113729			Tu4	58475692	AAGGTGCCCGCCATCAATGAAGACAAAGAATACCAGGTAGCAAACGAACA[R]AAATGATCCTGACCTTTGAGGGCAAAATATATTCTACAAAGAATCTTTAT
AX-94862616	8.956	4A	543741072	4B	78021202	4D	53236812	Tu4	62573679	ACCGCCTCTTCCTGTTGCAACATTTCAGCCAAGTGGAAATCCGAATGTTC[Y]TGCCTTTCCTCCTCAAAACATGGAGGTAGCTCAAATCCGCAGAGGGAGCA
AX-94945797	12.838	4A	541340635	4B	82665413	4D	55581646	Tu4	63838401	GGTCATCACCGTCTTGGTGCTTCTGGTTCGAAGCGATATGTATATGTGGG[Y]TTGGGTTCTGTCCACTGTATGGTCTCATGGATCTGCTATGATCAATGCCC
AX-95150779	12.838	4A	541172463	4B	82918919	4D	55645134	Tu4	64099677	CAGGAAGAAGAAGCCATGGCGATGGCGGCCTCGTCCCCTTCCTTCTTCCT[M]TGGCACCCCTTGTCTCTACTGCATCACGTCACCCGCAGCTGCGCAGGCTA
AX-94921669	12.838	4A	519161447			2D	211557824	Tu4	74308278	AAGATTAACAAGCCCTGATATGCCGATCGGATGTTTCCATGGAAAATAGG[Y]AAAAGAATTGAGTATGGCCAAAAGCTTAAGAACGCGGGATATTTATAAGT
AX-95190358	12.838	4A	512357563	4B	107646862			Tu4	79401382	ATTATCGAGAAGTGGCATTAGAAATGGTCTGTGGAGAGCTCTGGTAATAA[R]CGGTGCTACTGTGCCTGGTAGAATTATCATGCATGTCAGCATGTGTTACG
AX-94472289	12.838	4A	525110338			4D	71532404	Tu4	94818261	GTGTTAGCTTGCTTCAATTGGGGCCGATGATCTGCGTGCATGGCTTCTAT[R]AATTGTAATCCTACGGACTCTTGCATTGCTGATAGGTGAAGTCCCCCAAA
AX-95161863	12.838			4B	109925710	4D	78431027	Tu4	100607700	AGATCCTGCAGGCTAAGGGACTGATGAAGAAAAGTGTCGGCTTCCGGCGA[K]TAGTTGGCTATGGTGAGGATAATTTCATTCCAACATACATCGACAGTCAT
AX-94855600	12.838	4A	505793175	4B	112352999	4D	80142530	Tu4	102936548	GGCCGAAAATCGACAGAAATTGTGTTTGCTACACGGATGCCCAGCTCTCC[Y]CCTAGTTCAAGAGGCAAAAACTGTCCAACCTCACCTGTGCATTCAAGAGC
AX-94479623	12.838					4D	77126059	Tu4	109865069	TGTCCAAAAGCTGTAGCAAGTTTCAGTTTTGAGAGACGAGGTTAACAAGA[Y]CAGGGCTGCTGATGGACCAACTACTTCTTGATCGCCGAGAAATCTTCCAC
AX-94412085	12.838	4A	361464772					Tu4	255351288	CTCTACGTCCAGTTTGAAAGAAGAGAGTGGGTTCTCAAATACAGTGAGAT[S]TTGGTTGGAGAGTGAGTAATGCAATAGTCTGCGTGTAGTATGAGGTTGGA
AX-94505752	12.838	4A	450792527	4B	182673279	4D	119823777	Tu4	346205765	GTGTCGTCAGGCTCTTGAGTGGGGTACTGTACGGATTCATCAGAGGATGT[R]CCATTATAGGAGAAGGGAGTCTTGCAATTGGTTGTGGACACTTCCAGTGA
AX-94414030	12.838	4A	347404582					Tu4	350238675	TTATGCTCAATGTCTCGGATTTTATGCCAATACAGATCGGACACATTTGG[Y]CGCCTTTTCGCTGTCAGGTGCCGAACAAGTACAATAGCTAAAGTTAGCAC
AX-94576066	13.254	4A	221513198					Tu4	160776554	GGATTTGTTTCCGGATTTCTGAGCAGCTAACCTAAATTTCGGCAAATGGG[R]TTATGTAGACGCACCATGGGGGAAGCAGTGTGGACAGCCAAAACTGTGCG
AX-94476473	13.254	4A	178844709					Tu4	392501628	AATCTCTTGCAACGATGACGACATGGCAGAGATGATATGAAAAATCTCAG[Y]TGGGCTGTATTCCTTGATGGGGTCGCGTAGAGGCGGCATGCACAATTGCA
AX-94787314	13.671	4A	78431027	4B	93289542	4D	62878685	Tu4	82189011	GGCTGTTCTTGGTATGGGCAGTGGGGATTCAAACTCGGAAGTGGGAGCTT[Y]GGAATTACATCTGAAACCTACAGCAAAGCCATTGAAAACCTCTCCTCAGT
AX-94693037	13.671			4B	385561011	4D	308760117	Tu4	418721816	AAGATGCCTGGATTTTCTTATCGTTCACATAGCCTGCAAGAGAGAATGTC[Y]GAGGACCAATTTGCAAATGAGAGTCGTGGACCGACAACTTCTGACTGCTC
AX-94832412	16.663	4A	90420102					Tu4	491102758	AGCGCACTATGCCTGGGTAATAATCTTCGGCAACAGGGGGGACAGCCGCA[S]CGCTAAAACTTTCGCAAATATCTTTGCAGCTCCGTGAATAAGGTTGATCG
AX-94387796	20.995	4A	16191593			4D	450509926	Tu4	568662851	GTAATTTGTGGTTGGTCCTAGATGGAGTGTAGGGAGAGTAGAGGCAAAAGAT[Y]GATGCATTCTTTTGCTCGTGTCGTCGCTATGTTTTGGCTGTGTCACTG
AX-94807329	20.995	4A	11811427	4B	569630638	4D	455746040	Tu4	572823087	GAAAAACCTGACCTATACAACAGAACACTGGGAACATCGGTTAGACGATC[R]TCGGGGCTCTGCCTGCTTGCCGGCTTCAGTCCGCGGATCATCGCAAACAG
AX-94529621	20.995	4A	9909244	4B	573294500			Tu4	576715430	TCTGCATGCCGCACACATGGAACAAGTCACAAAAATCCCCATGTCTGATG[M]TCAGGGGAAACGTAGAACCTGCCATTGTCGGTGCAGACAAGTGCCCACCC
AX-94953480	21.412	4A	637895680	5B	674338476	5D	534028809	Tu4	591675525	CCACTTCCTTGGGTACTTGCAGCTCTCGGATCTAGTGACAACCTACTGGC[R]GCCCTGACCCTTGGAGCAACTGGAGCATTTCCATTTGACTCTGAGAACCT
AX-95179478	21.412	4A	631576049	5B	679051491	5D	538347992	Tu4	598619685	AAACTTCCATCTTCTGACCTTCAGAGGTGCTGGCAAGAAGAGGCCTTTTA[S]CATGGCAGGGTTTGTCCTCAAAAATTGCTTCATTCGGTTTGTCCTCGCAA
AX-95243342	21.412	4A	629860533	5B	680359018	5D	538788128	Tu4	600243271	GCATTGCCGGATGAAGGAAAAGTAGGTCCTGTATCGCTTAATACAGAAGA[Y]GCCGCTTGTTCTTAGTGATATACTACTATGTTGGTTGATATTTAGCCGGT
AX-94554728	21.412	4A	626285585	5B	684384267	5D	27690531		NO HIT	GTGTGTGTGCAGCCCTTCGGTGAGATCCCGGTGTTGGAGGATGGCGACTT[R]ACGCTTTACCGTAAGCCATCATGCTTTTTGATTTTTGAGCTATGTTTTTC
AX-94457436	22.672	4A	621768117	5B	690262022	5D	547070793	Tu4	606483603	TCTATTGTCATATTCTGGTGTTCAGATATCATCTCGGGACCTTGTTTTCC[Y]TTTTCTAGTTTTAGGTATGATGCTACTACGTAATTGTTTCCTAACACATT
AX-94430995	24.36	4A	619266680	5B	700330483	5D	548879164	Tu4	607466288	TTCATTGGTGTTGTAAGAGTGGTATTATAGTTATCATCGGTGTTGTAAGA[R]TGAGCAGTGTTATAGTTAGCATGATTCTTGGAGTGCTAGCATATGGTAGC
AX-94449850	24.36	4A	609807320	5B	705276924	5D	562867065	Tu4	613473518	AGCAGTTTGTCGATATAACAGCTCGTGGAGCCGCTCCTAGTGGAGAGATA[S]AGAGAGTACAAGGAAAGCCGTTAAGTTATGCGTCAGTTGGTTATAGACAA
AX-94750909	24.36	4A	610620216	5B	704849351	5D	562116375	Tu4	614330902	CCTCAGGAGTCTGACATGGATCAACAAAGTATTGAGTCGACACCAGATTC[R]GAGAAGGCCCTATGCCTCAGGGATGAACTCTCGGCCTTGATTGAGATGCC
AX-94579148	24.36	4A	611196985					Tu4	614439775	TCCAGCCATTAATATGTTGACTGGAGAAGAAGCTATTGATATTCAGGAGG[R]ACAAGAGGAATTAACTGAAACTGACAATCCTGAGCAGCCACAAACTGATG
AX-94757730	31.007			5B	712854041	5D	560093133		NO HIT	AGCGCTTCATAATAGCACCCATTATTGTATGCCAGCCCAGATATTAGTGC[R]TTCCACGACACGACACTTGGCTCCCTGATTGAGTGGAAAACACTCTTAGC
Chr5Au
AX-94418907	0					5D	3031797	Tu5	3205447	TTCCACCATTTTGTGGGCCAGGTGACTGGAAAATCCTTCATTGTGAAACA[Y]CGCTCCATCACGTAATCCTTGCAAGAGCTTAGCTTCGGCCGCTCCTGCGG
AX-95251288	0					5D	3031767	Tu5	3205477	TTCTCCCGAACCTCATGCTCACAGCCGCCCTTCCACCATTTTGTGGGCCA[R]GTGACTGGAAAATCCTTCATTGTGAAACATCGCTCCATCACGTAATCCTT
AX-94462983	0.417	5A	2312236	5B	1742220			Tu5	4483446	ACAGCCAAAATTTTTTACTCCAGTTACTAGAAATACATAGAACCTCGATG[K]TCGAACATACAAGCCAGTACAATTGTTAAATGAAGTTAGGCACAGTTTCA
AX-94909932	15.287	5A	11068567	5B	13436007	5D	14124237	Tu5	13751253	AGTCACTGCTACCAACAGATTCGGCCAAACCAACAATTTCTGTGGAGTAC[R]ACGAATAGCTGGTGTGGAGATGCGACGTTCTCCCCCATCCACTTCATTTC
AX-94706493	17.841	5A	13409110					TuUngrouped_contig_3203	5779	GCCTCGTCTGGGTGGAGGATAAGCTGGTGTGAAGATCCTGTGCAGAACCC[K]TGTTTATGGTGTAGGTGAACCCAAGTTTTGCGGGAGTAAGCTGGCAAAAC
AX-94406033	18.258	5A	13409348	4B	517161184	4A	45686508	TuUngrouped_contig_3203	5553	GGCTGGAGACGGAAGAGGCTGCGGTGAGGTGGCAATTCAGGATGCGCAAC[R]CAGCAGATGGCCATGGAGCGAGGGGCAAATACATCGTACCGGCAAAACGT
AX-95161525	18.258	5A	15738312	2B	315980995	4D	273923381	TuUngrouped_contig_4153	462	GTCTAAAGTACACACCCGTTGCCAGGCAACAGAAGGACGACCAAGGTGTT[R]GTCTGAGTTGAATTCCATCACCCTTAACCACACAGTACATTGCTGGTGGC
AX-94623475	18.258	6B	143438802	5B	16033800	5D	22441122	Tu5	18459148	CAGGACGCACTCGTGGCTTCTTATCCTGCACTAGGCGATCTTGGAAACAA[Y]GACATCTTCAGCCGTCCAGAGCTAACCATGTTCGTGTGATCAATCAACGC
AX-94573346	21.692	5A	21448741	5B	24154318	5D	37025450	Tu5	24940659	CCAGCCTCTGGTTTTAGCTCGTACACCTTACCACCGATGCAGTAGGCTTT[M]ACCCACCAGTATCTACCTTGCTTAATAAAAGTGATTTTATCTTCTTCATA
AX-95194447	22.529	5A	25703663	5B	27298895	5D	36481084		NO HIT	CATCGGGTCAAACCTCTGAGGAAGTCAGCCCTCAACCTACCGATCCGGCT[M]CGCGGTCCACAAGTAATCCGAAAGAAAGGCCAGCAGCACAAGTCAATGCA
AX-94647555	26.861			5B	41315383			Tu5	40253069	CCTCCTCCAACGTTCAAGAGGAAGTAGGAAAGAGAGTATTCTGAACTGGG[Y]CCCTTGGATGCTCATTGTGGCCGTCTTTAGTTCCTAACCATGTCGATCAA
AX-94922512	26.861	5A	37624616	5B	47586227	5D	46314274	Tu5	44535556	AGACGATAGTACTGAAGAGGTAACACAGAGAGACTCTGGTAGAGATGAAC[Y]GGAAGATGCAGGAAGCATGAATCCTGACAATGAATTGAAAGAAGTGCCAG
AX-95240400	26.861			5B	50507619	5D	46980759	Tu5	44859782	AGAGCGATCTGCTGGAGCACCGTGGGACGACGACGGCCGGCAGCTCTGCT[R]CCCAGGGACGCCATGTTGATGATTGGAGCTTGGAGGGCCATGTTGATGAC
AX-94999851	28.122	5A	41351591	5B	55311191	5D	52257566	Tu5	48531563	AATACAGGGATCGTCTCCAAGACTGAGAGTGACTTAGTAGAAGCCGTTGA[Y]CGTGACCTCAGAAAAATGTTGATAAACCCTAGAGCAGCAGACCCTTTAGC
AX-94403987	31.556	5A	64366034	5B	82477517	5D	71887159	Tu5	64992259	TTAGCGATCAGGTCCAATCCTCTGGGAATTCTGCTGTGTGTACAAAAATG[K]AAACAGCCTTGACATTGTTTGTTATCTTTTGCTGGGAAGTTTGTCCATTG
AX-94477803	31.973	5A	109279377	5B	115074793	5D	105103667	Tu5	111742027	ATATCCTGAGTTGATATGGTGACAGTGAGAGAAGAGACACGCAAAGGGCC[R]TGGACAGAGCAGGAGGACATGCAACTGGTATGCACTGTCCGTTTGTTCGG
AX-94675621	31.973	5A	110373129	5B	116843789	5D	107567356	Tu5	111930436	TCTCCTTTCAAGTATTACATCTCTCTTTCAGCCGTACTATATGCCCGTAT[K]ACAAAAGCATGTTACTGAGGATGTTTATAAAATACACATGATCATGTAAC
AX-94864905	31.973	5A	115249539	5B	121533104	5D	112357305	Tu5	113111975	TGAACGGCGACGGCGGCACGTCATGATCGGTTACCCAGTCATAAATTTGT[K]TCAGAATAACGCATTGCATTAGCATGTCATCAACCATCCACACATATGTA
AX-94489520	31.973	5A	113607444			3D	471427929	Tu5	117982671	GAGATTGCTATTACACCAGGGATTGAAAAACTGGTCCTTTTTCTGCCTTC[R]GGATACCAAGAAGTGTACACCTTCCCATGCTCACGTTTATTTGGTCAGAA
AX-95231293	31.973	5A	113608557					Tu5	117983784	ATGATGCAGAAGACGAAGACTTTGTCGGTAGATGTTCTGAAACTTCTGCA[Y]GGAGATCCGGTAAATGCTCCCCCAGACAAGTGAGATGATGTTGGAATCTA
AX-94680001	32.81	5A	180365947	5B	164403430	5D	142049637	Tu5	158439600	CGACTCCAGGGACAGCTATGAGCCTGCAATGTGAGCCACAGCTCGGATTG[Y]CACCGTGACTGGATCTCCTCATCCAGTACGAAAACTCACGGTGCTGGCCC
AX-94940126	32.81	5A	279563370	5B	228762231	5D	214087710	Tu5	176589193	CCAGAAGTTATTGAATGTTGGGGGATACAAGTGAAGGGATCGAATGACGA[R]AAGCCGGAGCTTGTAAAGGGGACGGTCCTTGAGAGATTCAAGGAGGATCG
AX-94872516	32.81	5A	269760600	1B	223035996	3D	570062471	Tu5	189789081	AACACACCCATATGCAACCGTATAGCCGCAGTAGAACTCTGCGTATAGCC[R]TCGTAGAACTTCATGGCCGCTCGTTAACCTACTGTTCATCATTTCGTTGT
AX-94724532	32.81	5A	297721399	5B	248388727	5D	327435575	Tu5	200406713	AATTCCGCTCTTTCGTGGCACTACTGCTGAGTCATGTGGCTTAAGAAGAT[R]CGTGATTGCTGTGAAGATGGATACTTGGATGCAGTTGAAGTTCAAGGTAA
AX-94545883	32.81	5A	228886543	5B	213471741	5D	191260292	Tu5	202207614	TAAATCAACAAAGATCACATTCGGTGATTCAGACGAGGAGTAACTAACTT[R]CTTTGCTGGTGTTGGTCATACAGCAGTAGAAAATTCATCGATACCGTAGT
AX-95166372	32.81			5B	196269757	5D	193131241		NO HIT	CATTTCGTTCAAGTGTGACTGTTGATAGCAGTGGAAATCCTGAGCTTACA[R]ATGACAGGGAAAACAGTAATGACGCTCCTACTAGTGGGAAGACAAGGACA
AX-95213331	32.81	5A	264093219	5B	206505607	5D	205872515	Tu5	207987162	AGCTCTCTTAAAGAACTGGCATCATATGTGAAAGCGCTTGCGAATGATCC[R]GTAGCGTATGCAGAATACCATGCATGGAGGCGATGTGGTGTTCTCGGCAA
AX-94635581	32.81	5A	288911102					Tu5	218456676	CAGATGGATTTCGTTATCCGGGTGATAGCACAGACGAGCAGATGGATTTC[R]TTATCCGGGTGATAGCAAGGAAGCTGAAGAGCATGATGGACAAGGGACAG
AX-95183070	32.81	5A	206725001	5B	194190529	5D	150829838	Tu5	231763886	CTACTTGCGCAGGGGTGATTTCACTGGCTAGGATTGCAAACTATCAATCT[R]GTTTGTATTTTGTGCTGCCCCTATCTGCTACAGCATACCCAAAACAGTTA
AX-94860483	32.81	5A	292256159	5B	241804780	5D	218938827	TuUngrouped_contig_6019	2734	TGGGCTAGCTCTTCCGTCGAGGTCGAGTAGACGATGCTGGGCATTAAGTT[S]ACACAAGGAATCATCTGACGACGATCATGGTGATTTTAATCATATCTTAT
AX-94592593	32.81	5A	319230401	5B	269977522	5D	234847482	Tu5	302536865	TAGTGATAGAAGGCAGGGTCTTCAAATTTCTGCTTATTTAATAGCTCCCT[Y]TGAGGAGATACAGATTTGAAATACTCTACTGTCAATCTCATGCTCAAACA
AX-94653176	32.81	5A	317234295	5B	267755980	5D	238117721	Tu5	310504658	ATGCGCAAGGTTTATGTTGTACTATCAAACCAGAATTGTTTCCAGTTTTC[Y]CTGTGAATAGCCTGGAATTCAGGAAGCCAATAAGATGATGGCACTAATGT
AX-95106604	32.81	5A	325952195	5B	275057439	5D	231330898		NO HIT	CGAACTTCATGTTGTCTGTTTGACATTTGTGTAATGCGGGAGACAAGGGA[Y]GTGATGTGCGATACGGCGGTGATTGTAAATATGGGTTTTCTTTGTTTAAG
AX-94620820	34.498	5A	327435575	5B	276660067	5D	229186740	Tu5	299246237	GACCGACCGAGGTCGGTTGGTGGTCCATGTTGGCCATTAGTTATTAGGAA[R]CTTGCATGCCTGATGGTATGATCTTGGATCCATGGATGATGTATCTCAAG
AX-94720622	34.915	5A	341898961	6B	21775563	6A	362708666	TuUngrouped_contig_2787	8261	TGCTTCTGCATTTCCCCCTCATGTCCTCTGACGAGAAACCACATCTTGGC[R]TGCAGACTACTGGGAGAAACTGCATGGAGGAAGGCTCGCTCCTGGGAGAA
AX-94530100	37.907	5A	362175719	5B	308556674	5D	272361252	Tu5	341508719	ATCAAAGGCCGCGAAAGCAGCGAGGCTCGAGAAGTTTGAAATACCAGCTA[R]GATCATTTTGCTGCCTGAACCTTGGACCCCAGAGTCTGGGCTTGTGACCG
AX-94945951	37.907	5A	374627958			7A	531669347	Tu5	354840421	GGAGGGGATCAATTGGATCGAAGCTGCCAAAAACCGAGCACGGCAGATCA[R]AAACACCAGCGGAAAACACGATCACTGGCGCCTCGCTCCACCGGTTGCGG
AX-94610088	37.907	5A	374630084	3A	644926400	6D	360613874	Tu5	354842496	TGAATGTAGGCACCATCTGACAGTTGCAGCTTCACTAACCGGCGGTTGTA[S]CTCCTCAGTTGCATCACGTTGCGGCACCTCCTGCAGCAGCACGGCTCGTG
AX-94549037	37.907	5A	376098432	5B	322141825	5D	284181775	Tu5	355969200	CCTACATCTTTTGCGAGTTATCTGAACACTGATGTGAGTAGTCATGAGGA[Y]CAAGATGCATTGAGAAGACTCAACCCTCCAGATACGAGGACAGTTCCTCA
AX-95137032	39.595	5A	398545661	5B	337833116	5D	297501865	Tu5	380200038	AATCAAATGGAAGAGATTGCTGAGGTCGCCAAGAACGTTGCCTCACGCGG[Y]AAGGATAAATTGGCTGCTTGATGACGTGAGATCTTGTAGCTCGTTGGTAG
AX-95184336	39.595	5A	398755270	5B	337188596	5D	297150358	Tu5	381056211	CATCAGTCACCAATACCTTAGTAAAGCCTGAGGCGGCACTTCGACGAACC[R]CAGAAGCATTTCTTCTCCTTCACCTTGCCATTCTTGCGCACATTACCTAT
AX-94643878	44.84	5A	432229990	5B	387365497	5D	331573868	Tu5	411954395	TGTTGCAACCGTCCTTCAGACTAGATATACAGCACCTGGATTCTGGCGTG[Y]TGGTCTGAACCTCTTCGTAGCAACAGAGAAGCTGTTAACTAATCCTGCTG
AX-95156762	45.677	5A	442702241	5B	401011031	5D	341567375	Tu5	419533806	CCCCAGCTAGCCACCCCGCAACCAGTGTCCAATGCAGTCCTGACGGTTCC[R]TTGGCAATCGGTATAACTGATGCCAGTTGATCAATGTACTTATCAGCACC
AX-94466093	65.846	5A	479601877					Tu5	457861385	TCTTTGTTAGGTCCAGTAGCGGTAGTTTCAGCCTGCAGTGTTGTAACGTT[K]AAAATGTTCAAGGACACATTGTGAAGTTTAAGATACTGTAATCGACTGTT
AX-94569085	68.4	5A	484437511			5D	384017949	Tu5	462731563	AAGTTGCTATGTATGGTCAGAAGCAAACCGTTGCCAATGTTCAGAAAGAC[Y]AGTGTGTTGTTCCAAGAGCTGTATTTTTCCTTAATGCCGTTTCTTGTTGC
AX-94538890	75.523	5A	491311590	5B	466935377	7B	291830282	Tu5	470832923	ATGCTATTATTCTCATCGCTAGCTAGCCTCAGTTTTTGCGGTCCATCATT[Y]GCTCGCTCCACCACGAGTTCTCCATCGATATGGGCCCTCTCCCTCATTTT
AX-94426799	75.523	5A	491311677	5B	466935463			Tu5	470833013	CTCTCCCTCATTTTCTCGGGATCAATGTCCACGAAAACACCGACGGCATC[Y]ATCTCCCAGGAACAAAATACACCCTCGCGATCAAGGCGCGGCCATGCTCA
AX-94997175	79.855	5A	504873151	5B	479635097	5D	399227350		NO HIT	GTGAAGCTGCTCGAGCAGGACGTGTTCCTATGAAGCAAACCCTCAGACCC[R]GCGCTCGTCGATCCTAAAACTCTCCCTTGGTTCTGGACTCTCGGCGGTGT
AX-94415346	81.974	5A	521934378			5D	410395974	Tu5	494851579	ATATATAGGTGTCNNNNNNNGCCCTTGTGTTAGAGGGTCTGTTCGAGAGT[Y]GATGCCGCTGTTTAGGAGTTGTTCTGGGCTGAGATTGGAATTGATTACCT
AX-95248126	81.974	5A	522065051	5B	492618658	5D	410430293		NO HIT	AAACACTAAAACATTCACCGAGAGCATGTACAGCAGTGGCAGCAAGAGTA[Y]CGTCAGGAGAACCCAACTGCGGGCTGTTAGTCGAACAGCAGGCGTCGGCG
AX-94688509	85.409	5A	535137643	5B	507873447	5D	421533120	Tu5	500600869	GATCCATGGGCGCGTTAGGGACACCACGTCTGTCTTTCATTCATCATGTG[Y]ACTGAAGGGTGTATGTATCTGATTTATTCTGCCATGTCATTTTGTCAGGC
AX-94456236	89.29	5A	544573232	5B	518078452	5D	428825362	Tu5	516736564	TGTGTGTAAACCGGTCGACAGTAGTATTTTGTTCTTCTATGGAACCCCGC[K]CCCAGATGAAAACAGTGTATACTCTTGTTTCGTTTTGGACGTAGATTGAT
AX-94899135	94.535	5A	552954221	5B	532600991	5D	438105587	Tu5	523799967	CCGCCCAGCTGGTCGCGAACCGGATGCAGACGCATATGGCCGATTGATAG[R]GACCCAAGCTCGACATGGATAATTTGACATTTGGACGCATGATTCCGGCC
AX-95250063	94.952	5A	552956785	5B	532603539	5D	438108151	Tu5	523802533	AATCCAGTAATGGAATCAATAACAGTAACACCTACGAGCATAAGTGCTTC[Y]CTTCACTTACTATAACAGATACCTTCATATAGATTTCAGTTTTCCATTGA
AX-94924345	98.386	5A	558692736	5B	538725384	5D	442505009	Tu5	527959668	GAGTGCACAGCTACTGATTTGGCGCTCGAGGACACCATCTATGCGCT[Y]GACAAGGCTGTGCAGGAAGGATCGGTGCCGTTCGACGGCTACCTCAGGAGCGT
AX-94428806	98.386			5B	539023087			TuUngrouped_contig_6631	3183	TATGCCGATACGGCACCAGCCATTCAGACATGAAAAGCAAGATTACAGAC[R]GCAACAGCAGCCAGTTCCTAATTCAACCATGGCAAATAGATGGGTACACA
AX-95177729	98.386			5B	539285878	5D	443004799		NO HIT	GCTACCATCAAAGTTTCGCATTCAGACAGTTAACATTACGG[W]TTCGTCTCGCGCATATTCGGCCAACATACAAGCTCATGAGCAAGTTTACATGTCCTGTC
AX-95073230	98.386			5B	539289191	5D	443008712		NO HIT	GGTTTGCAGAATGATCTTGTGCCAGTGTCAAGTAGAAAGATATTTCTTTC[R]TGTAGTGTCTGGTTTAGTGTTATGATGCTAGCAACCATGCAACTGAAGTT
AX-95097918	100.074	5A	564241528	5B	544401327	7D	142146551	Tu5	532629708	GTCCAAGAAAAGCCACCACTCCCACCTACAGTTACTAACC[K]GAGTTCTGAGGACAATGAAGTTGCTGACCTGAGTTCTGACGATGAAGTTATTGACCCGAG
AX-94945628	104.406	5A	574347536	5B	558342316	5D	456608134	TuUngrouped_contig_6271	7535	GTGCAGCTTATGGAGGCCCTCGACACAAGCAAAGGCGGCGGTATGATACC[R]GATGGCCAGTCGTCCGGATGCTTATGTTTCACCAGGGCCCGTGGCCCGTA
AX-94430309	104.406	5A	574867862	5B	558714907	5D	456829481	Tu5	540780124	TGGGGATGAACTTTGCATGTAGAAGATGCTTATCTTGGTATTGAAACTCG[Y]GGGAATTGTTTATCACCATTTCCACTGTGAACCCTGTTTTTTGAGTTTTA
AX-95191725	104.823	5A	575699876	5B	560440058	5D	458091081	Tu5	540969073	GGCTGGAGGAAGAGAAGGAATCCATCCTCACACATATGGCCGAGCTGAAG[R]AGATCCTCTACGGGAAATTTGGAAAGGCCATCAACCTGGAGGAAGATTGA
AX-94385638	104.823	5A	575699900	5B	560440081	5D	458091104	Tu5	540969097	TCCTCACACATATGGCCGAGCTGAAGGAGATCCTCTACGGGAAATTTGGA[R]AGGCCATCAACCTGGAGGAAGATTGACGTCGAGAACCGGAGCTGCCTTTT
AX-94891640	110.531	5A	594960176	5B	582887056	5D	475507366	Tu5	559063375	TCGGTTGATCTCAGCATGTGCGTTCTGTTCAATTAGTCCAAGGTTGCCGA[R]GCTTGAAAAACTCCTGAAGACTTGGTTCAGTGAGAGGAATGGGTTCAACA
AX-95137623	116.239	5A	601341612	5B	590183217	5D	481760879	TuUngrouped_contig_4449	1671	AGTCGCTGCTCGGTCAAAGGAAATTAACTGCTTTGTGGGAGGAAAGAGCT[Y]GGGAACTTGGATGGAAACCAGGCAATGTCAAACCACACCGGAATCAGTAA
AX-95095036	116.239	5A	601615639	5B	591193205	5D	481986494	Tu5	564563813	GCCCAGAATACATTTCTGAATTGGTCGTCTTCATCCACTTGAATGGAACA[R]AAGAATGAAGGATTCTCGCCTTTCATCCTCTGTAAATATTCAGAAATTGC
AX-94903992	116.239	5A	606895529	5B	597220993	5D	486169170	TuUngrouped_contig_2328	3427	TTCAATGGCATTTGTGATGTCTAGATAACTTGAGCTGCATATCAGCACAT[Y]GGCGCTGATCATTCTTTGACTGCTTATTAAGCTCTTGCGGTAGCCAACCT
AX-94399337	123.362	5A	613585637	5B	606018546	5D	491435919	Tu5	578121100	TACTAACACGATTCGTAAGCTGTAACAATTCTTAATGCTTAACTATCCAC[R]CTCATAGAAGATCCCATTACACGTAATAATTCATCAAATATAAGTTGGGA
AX-94557327	131.941	5A	635502476	5B	639167616	5D	507886945	Tu5	592271170	CCCGTATGTTGTTTCAGCTTGTAATTTGTTTGAATCTCTAGGAGAGACTT[M]CTTAGTGACATGTATCCTATGAATTTGGCGTGGCGCCTTGGTTGACAGTG
AX-94497385	131.941	5A	641731205	5B	644887966	5D	513975581	TuUngrouped_contig_4504	7157	GAGCTTTTGTTATCGAAACCAATTAGCTCAAACCACATTGTGAAGAAAAC[R]ACAGCAGTCCATGGCAAGGAGCCGACTATGCCTTGCAAGACGATGATTTG
AX-95095532	132.358	5A	649843145			5D	521488641	Tu5	604110644	ATGATAGCCAACTCTGTGATGTTGCTTCTTGACAGAATCAACTCACCATA[Y]GCACGGACTTTAAGCCTCACCAGATGAAACTTTGTACGTATCAAATATGG
AX-94381965	134.477	5A	654166188	5B	663225869	5D	526091952	Tu5	610786282	CAAGAAAGCGGCGCACCAGTTCCATTAACGCGAGATTCGATCAAGCAGTG[Y]GAAAGAGAAGACTGACATGTGGCAAGCTTTTTGAGGCTATACATTAAACA
AX-95079379	135.314	5A	658872520						NO HIT	GGACGACAGTTTGTTTGCACGTCCAAGGCTCGCGGACGAGTTGTGACATG[Y]GGTCCAAGCTCTCCTGCATCACTACGCTCGGTTGCTACGCTCACGGGCTT
AX-94483629	135.314	5A	659722122	4B	612764029	4D	482777647	Tu5	615180263	TATACTTACACATCTAGAATAGCCATACTCATACTGTAAATCTGCCATCT[R]GTACTGAACAAATTGGTCTCTGCAAAATCATGAACTGGTGTGGTGTGCCA
AX-94622175	135.314	5A	660198815	4B	612213708	4D	482363181	Tu5	615616987	GTTTGTACATACTGTACATGTTGTCGAAGTAGCATATTCTTTACACGGTA[Y]GGCCGTGAGGCCTTGGTTTTGTACCATTCTTGCCAACTTAATCTTAGGAG
AX-94815565	135.314	5A	660444777	4B	611851480	4D	482156366	Tu5	615904928	AGACCATGATGTATGCCTCCAGTGAAGGAGGTTGAGAGGGATGACTGCCT[Y]TAGACACACGCGGGATTTCAGATGAGACTCCACTCAAGCCAGAGCAGAAG
AX-94795640	135.314	5A	660444787	4B	611851470	4D	482156356	Tu5	615904938	GTATGCCTCCAGTGAAGGAGGTTGAGAGGGATGACTGCCTTTAGACACAC[R]CGGGATTTCAGATGAGACTCCACTCAAGCCAGAGCAGAAGATGGGGCATG
AX-94504845	139.195	5A	665478090	4B	617003780	4D	484668646		NO HIT	GCCTCCTTGGTTGATGGATTGGTGCAGAGGCATAGCCCAATAAGTAGCCT[Y]AGGCGTTGAATGATAGCACACCTTAGTGAACATTATGCTATATAAGTGAA
AX-94398500	140.456	5A	667941869	4B	621985327	4D	487045613	TuUngrouped_contig_5569	3118	ATCACACTCCTTCCACTGTCCCCAGGTCCTACAATCACAGAGCAGGCGAA[S]GAACCAGAGGGTGAGCCCAGCTGCAACCGTGGGGGCGAGGAGAGATCAGA
AX-94445171	142.574	5A	673369760					Tu5	628678696	GTGATAGTCATGGGGTGCCATATTAGTCCGTCCAT[M]AAGGGACTTGTTGCTACGTTCTCCATCCTCCAGGTGTGCTTGATCATCTGTGCCGCCGCCGCTGC
AX-86179557	146.009	5A	678229471	4B	639149450	4D	497914048	Tu5	632007482	TCAATCGGAGTGTAGACAAACTACTGCTCGAGCCAAAAAATTGAGACCGG[R]GGAGGAAGCAGAGACCCCTGCCGTCGCCTCTCCAGAATCCATTCCCATCC
Chr6Au
AX-95193570	0	6A				6D	3917370		NO HIT	GTCGGGGCGGTGGCCAAGGACCTTGGCAACATCTTCCAGGACTGCGAATT[Y]GATTGCCAAGATTTTGATCCATCCTCCGACTCCTACTTCATGTGCATGGC
AX-94805250	0	6A	3289242			6D	3992581	Tu6	5092529	GTCGATCGAGTTTTATTAGCTACACGTGCATGTCTGTACTGTCTGCAGTT[K]CTTGTTCTTGTCAAGGGTTTGTAATGAATAAAATTATGTGTGGCTTGCTG
AX-94700575	6.175			6B	20960419	6D	11069519		NO HIT	AAGCAAAACTTGTCCAACTACTTCCTTTGGGAGATGAGGGAGAAACCACT[Y]GCAGAAATAGTAGCTACTCAAGTTCTGGAGGAAGCAACAATTGAAGAGAT
AX-94414937	12.822	6A	21518816	6B	36206235	6D	21981300	Tu6	18633977	GAAGTCAGACCCGGATGCTTCATCCCTCGATGTAGAGAAACTAGTTGCCA[S]CAAAAAGGACACGCTGGATGTTATTTTGAAGGAGTTCATGGAGGCTAATA
AX-94388846	18.997			6B	50124652			TuUngrouped_contig_4986	7896	GACATTGAATCAAAGGGTAAACAAAAGTGCAACAACGGTAACACCGAATT[W]CAGAGTTCAGCAACTCCTTTCAACTACATAGAGTAAGTAGGGCATCATCT
AX-94892706	24.705	6A	57763870	6B	93822705			Tu6	54304000	TATCAACGCAGAGTGCAGCCTTGTTGACATGGATAACATGGATGACAGCC[Y]ACGAGTGAAGCTTGCCCAGATCAATATGGATAACCATGAGTACTCCAGTG
AX-94663483	25.542	6A	58150558	6B	93999801	6D	42564602	TuUngrouped_contig_6635	8850	AAGATAGGCAGGTTCATTGCTGACACCGTCTCCTCCATGCCAAAGCTGTC[Y]CCAGCATCTTTTGACAGGCTCTTCAATGACAAGATTCAGGACAATCTTGC
AX-86167869	35.622	6A	90032550	6B	147961353	6D	73587857	Tu6	84538345	ATCAAGAGCCCATTAGGTTCTCTGGTTCTGAGAGTTCACTTGTCACTGCC[K]GTGCTCAAAGTCATCTCCCTGCAGCTACTATTTCTTCTGAATTTTGCCAC
AX-94446593	39.503	6A	107215281	6B	171030023	6D	89069278	TuUngrouped_contig_5918	6448	GGGATCGACCCACCAAGTGAGTTGTTGTACAGCGAAAGTATTCTCAATCCYGTTATCATCCCAAGCTCCTTAGGGATTCCTCCTGTGAGATTATTTGAGTT
AX-94417743	39.92	6A	119290095	6B	286706123	6D	157652761	Tu6	114807946	GGAACCATATTGGTGCAAACTACAAGGGGCTTGGGGAACTCTTGGAATAT[Y]TGAATGTGCGTCATTATAATCCTTCTGCTGCGGATGCCATAACAGAGTCA
AX-94988417	46.567	6A	119609635	6B	183716522	6D	99568461	Tu6	115089629	CTTATTTCATACTGCTGATGTTGTAAGCTGTAACCTGAAACGGACTCATT[S]TAATCTTTTATGTAAAGTGGAATGGTGAACATTCTTTATTTCGGGGAAGA
AX-94645609	46.567	6A	146574038					Tu6	139633810	GTAAAGAGCGAGGGGCTAAGTGGAGGCCTTGTCCTCTTTTGGAACAATGA[Y]TCGGTGGTATCCCTGAAATCTTTCAGTCGGACGCACATTGATGTGTTTGT
AX-94711679	46.567	6A	146574215					Tu6	139634037	TTAAGCTGGGACCTTATGAAGTTTCTGCGAAGGGAGTTTAATAATCCATG[K]TTGATAGCCGGAGACTTTAATGAGGTACTTGATGCTTCCGAACAATTTGG
AX-94462450	46.567	6A	230706190	6B	295765563	6D	178003799	Tu6	228191370	TTGGACGGGTCCTCGTGAGGAACGGAAAAACTTTTGAGTTGTAAATGAGA[Y]AGCTACCCAAAGAGCTCATCACGAGGAACGGGAAGCTGTAAAAGTAGGAG
AX-94629403	46.567	6A	270781024	3A	686076522	7A	60649559	Tu6	249642445	TTTTTCGGAGACCAATGAACGTCTTGTTATTAGTACCACCAATTATATGC[S]ACTCTAGGATTAGTCTACGTGATCATAGTTATGTCTTGATTTATTTGCCG
AX-95199148	46.567	6A	322703981	6B	348092176	6D	262427811	Tu6	306078514	GTGTTCCCTGTTTGGAGAGTGTATATAGCTTCACTGAAGTTCATGATTCT[K]GTTACTGAGGCTTGAGTTTATTTATGTTGATGTATATGGTTTTCATGACT
AX-94910882	46.567	6A	330043725	6B	352061439	6D	255026202		NO HIT	AAAACCCTGACGATCGTGCCTCAGTGGCTACAACTGAAATGACCGA[R]ATTGCACAACAGGTCCGCAGATGGACTATATTTCTGGTGGTTCGGCCTGAGGCA
AX-94674861	46.567	6A	445506630	6B	476173007	6D	308922414	Tu6	411120838	AGACACCGGGCAGAAGGCAAAACAGGCACCGGATGTAGATGTGAACGGCA[K]CAGAAACCGTGAAGGTACAGGAGGATCAAGGGAAGTGCCAGGTGTTGGTT
AX-95140098	47.827	6A	454810290	6B	506870164	6D	317405097	Tu6	427597877	TCAGTTGATGTTTCACAGCGAAGCCCATCCCTCTTGACCGGTGATCTACT[Y]GTTCCTGCTACAGCTAGTGATGTTTTATCAAGTATTTCCGAGTTCCATTA
AX-94433552	56.407	6A	456610005	6B	504588690	6D	318816511	Tu6	426140692	CGTAGACTGACTACCTGGTCTGCAATTGTACATTAGAGCGTCTTCTACAT[S]AAATGATCCAAAATTTGTGGTGCTGCTGTGCCCGTATCTGCTTCGTCTTT
AX-94488716	62.115	6A	492794005	6B	528905383			Tu6	461729558	AATTTCCTTTTGTTGTTAATTAGGAATGTTATGCATGTTAGGCTGATACA[R]AATTGAATCAGAAGTATGGCATGAACTGGTGCAGATCACACACATAACAG
AX-94468806	62.115	6A	495683926	6B	532333321	6D	353688842	Tu6	463032795	CATGTATAGGTTTGTGCCTGGCCGTGCCGCGATAGCTTATTTTCAGGATT[R]TGCCGGGATGCTTTTCTGTTTGGATTTTTCATCTTCCTTTGGTTGGCTGA
AX-94664517	66.447	6A	517664625	6B	562558813	6D	375811144	Tu6	486144995	TCATCTTAAGGTAGCAACGAAAATGTGTAGTAATAAGTAGCATCACTGTG[R]CCAACTAGCAGACTGCCGTTAGCATGTCAATTAAGTAGCATGCTGGTTAG
AX-94920318	67.707	6A	523935845	6B	570953464	6D	381983442	Tu6	491548359	TCTTGCCACTCCGGATGCATGCTTAGTACAATCATTGTCCACGTGAGCAG[Y]ACCGACGTTGTCTCCATTCCTGCCAAGTAGAATAGTTTGCACTCCTCGAT
AX-95630343	67.707	6A	530218887			6D	385702327	Tu6	494991349	ACAGCGGACCGAGAGACCTACTCCTATGCTGCTTGTATTGAAGCTTCGCC[R]GTCCGCCTGCCCCGACTATTAAAGTCACCCGGCCGCGGACGCAAAGCCCT
AX-94935112	68.544	6A	533399281	6B	579530641	6D	388117757	TuUngrouped_contig_5712	10676	AAGATCAACGAGAAGGCCTACAGCGATGATGAGGTCGTCAGGATTCTCAC[Y]ACAAGGAGCAAGGCTCAGCTACTTGCAACATTCAACAGCTACAATGATCA
AX-94478906	68.544	6A	534962071					Tu6	499173945	GCTGGTGCACTCAGTCTGTACACTAGGTAGAATCGAATCTCTTTGCTTGT[W]CCATTGCGTCGCGTGGCTTCCAGATTGCCATCGTTTTGTTTCTTGTATTT
AX-95630344	70.663	6A	543397831	6B	593714133	6D	397085388	Tu6	503606149	ACTAATTGGCCGCACACAACTGTAGCCGGCAGCACGTCATATCAAATCAG[M]CAGGGGTCACTGATTTGAATGGCCGGCGTCGCCCATGCGTTCCTGTGGCC
AX-94551877	73.655			6B	651417492	6D	431463039	Tu6	534228387	GATGATGGAGCTGGGGGCGATAACGAAGTACAGCGTACTATGCTTGAAAT[Y]GTCAATCAGCTTGATGGTTTTGATGCTAGGGGGAATATCAAGGTTCTCAT
AX-94430975	75.343	6A	564269639	6B	634330423	6D	420957929	TuUngrouped_contig_6235	4405	GCCTTTTTGCCTATGGCACAGAGAAACCTTCTTTCGGTACTGGAATTAAC[R]TGGTCTGACAGCAGTAGAAGCTGCCAAGCTTGCCCATGCTGGCTGGAGAG
AX-94805147	79.675	6A	573491342	6B	645525890	6D	428909010	TuUngrouped_contig_5440	3003	AGACAGACACCAAGGATCAGCCAGTCTCGTTATTCACTCTGAGCTGACGC[R]TGATCTAACTGTTGAGAGTAACCTATGATGATCACATCGTGCCAGGGTTT
AX-94420467	81.794			6B	645658866				NO HIT	GGGAATACATTGAGCAGCGGCAGGCATGGTACCAGGAGAGCCTCAAGTTT[Y]TGCATCTGGACTTTTACAATGGAGAAGCGCAGCAGCAAGCCAACAGTGCC
AX-95143639	88.917	6A	592278597	6B	672126785	6D	445720603	TuUngrouped_contig_7545	1223	CTGATCGGTATTAGAGAAGAAACAACTAGCAGCTGTGCACAATAAATACG[K]GTTTTGCTACTGATAAATTATGGAACTGTATGGAAACATGTGGGGATATA
AX-94978966	91.471					6D	448366584	Tu6	550766065	GGCGAAATGAGGCTAATTTTTGCATCTCGGTTGTTAACTAGGTAGAGCCA[S]GGATACACCAAGAGAGGTACCCAGATTAGTACATGAGCCTAGAAACCATG
AX-94486279	91.471	6A	596384571					Tu6	552272727	CAATAGTATGTGGTTGTACTCGTAAGCTACCTCGAACTGTACTTGGAAAA[W]CTATTTTTTATTGGATGGCGGTCCCTACCTTAATCCCGATCAGGCGCAAT
AX-95211372	96.257			6B	686172593	6D	451763554	Tu6	552961348	ACTGTCCCCAAACTCAAATCAGCATTCTTCTGGATCTTAGCATGAAGTCG[R]TTTTCAAGGCTACCATTTGCCATATATGCAAATACGAGAGCTTTGAACTC
AX-94517126	106.847	6A	603282739	6B	694404472	6D	456558617	Tu6	559424962	TGGAGCACTGAGGATCCTGCTATGTGTCTCGCCCTGCCTCGAAGCGGAGC[R]GTTTGTGTCGTGTGAAGTTGTAATGCAGATCTATCCTCCGCCCTGGGACT
AX-94507628	109.839					6D	462844265		NO HIT	NNNNNNNGAGAAGTGGCAACACAACACATATGGATTGCTAGGGGCGAAGA[S]AAGTGGTGACACAGTATGACCTTGGATGGGTGTGCCGCCCCTCTCGCCCC
AX-94981543	110.676	6A	606767136	6B	701660534	6D	460573529	Tu6	563570884	GGACAATCAAGTAATAGGTGAGTAACAGAAAACGCGACAAAACCAGCAGC[R]AATGACTTGTATATAATACTACTATCATCCCCTTAACATCGACTATTGTT
Chr7Au
AX-94901129	0	7A	42076256	4A	649901932	7D	42644491	Tu7	41630794	AAACAGGGCAAGTCATGCAGATCACAGCCACAGATAACTCACCTTGATGG[K]CTTGACTTGGAGGTGTTTGTTATGAAAAATGATCAGCATATGGGTGCAGT
AX-94700184	0	7A	42076874					Tu7	41630176	CAATTCAAGGACATGGAATCTATCCGAAGACTCCTTTTTCGAGGCATTAC[R]CCTGGCATCTTTCTTCCTCGGTGGTACTTCAGTGCTCCATTGCAGCAACA
AX-94732708	6.647	7A	53580698	4A	665864612	7D	50683941	Tu7	46177270	ATGGCTATTGTAATATCACATATACTACACATCTGTATAACGATTTATTG[R]AAAGCTCTCCATCAACAACCAACTCTGCACCCAACCCATCGATTTAGTAC
AX-95122633	8.335	7A	53904693	4A	665502789	7D	51475798	Tu7	52167880	ATTAAATGCTCGAAGCTACCAAATTAAGTGGTGCTGGCCCATTTGTCCTT[Y]GTTATTCGTATTAAAAGAGGTCGGGCCTCAGGAGATCAGAAAGTTGCCTT
AX-94609778	10.889	7A	62830945	4A	674853640	7D	58460108	TuUngrouped_contig_5800	15733	CAGCAGTAGAATTTGGTGGATGCAGTTGCATTATTTTCCCATTGAACTGC[Y]CAGGGGGAAGGAGCTTTTATGTTGGTTGTGTTGTGCACGGGTCAGACGTT
AX-94847486	13.881	7A	65924498	7B	3689387	7D	63279785			GTTCACACGAATCGAAACACACAAATTCAACATTGATTTCTGAT[R]CATCTCAATGGAATTTTGAAACCTGTATAGTACATGGTGTTGACGACGCTCCTCTT
AX-94407354	29.313	7A	85153648	7B	33071782	7D	83564503	Tu7	84010065	CGTATAGTTACCCTACAAAATTTGAAGCGCCTATATTATCCCAATACTTC[Y]AAGGGATTCAGGGTTTATTAGGCAATTGACGCTATCCGGTTTCAAACACC
AX-94945900	30.15	7A	85372428	7B	33549231	7D	83750126	Tu7	84152608	TCCACCAAACAGTTGAAAAACACAATATCCAACGTGATGTCTGAATTCTC[R]ACAACTCTTAACACTGTGTCTATTTTCTTTACTTGATCAGCCCTTCCATA
AX-94933672	32.269	7A	90552082	7B	40613420	7D	89553160	Tu7	87241034	ACTTGTGCAGAACAATTGAGCTAGATTGGTGGGAGAGAAAGTGGTCAGGA[S]CACGGATCCTATCCATCAAGGCCCATCTCCGGCAGGACTCTCCAGCAAGC
AX-95200460	32.269	7A	94417660	7B	44814522	7D	92540472	Tu7	90534561	CAGTTCATCACACTTGATCAGAGCAGCTACGAAGGCAATCCGTATCTCTG[Y]GGCCCACCGTTTCTAAAGAGTTGCTCAGTTCCTGAGCTTGAAGAACATGG
AX-95205348	32.686	7A	109135938	7B	187091592	7D	330120463	TuUngrouped_contig_668	64766	TATGTGTGTTCTGGACTGGTGCTCAAGTGTTCTGGAGTAGAAATCTTGTG[S]TCATGGATATTACTCAATTGTTTGGACCATTTAGTGTTTGAACTATTTTA
AX-94733664	32.686	7A	109136277					Tu7	710423933	TAAGGTTCAAATCACTCGGAAGAATATGAGAAGTGGGTATAGGAGGAGCT[Y]GAACATTAGAGTGGCAGGGGTGGAGCAAATGATTACAGGGCCTATCAGCA
AX-94683427	36.567	7A	117277240	7B	72019798	7D	112275344	Tu7	116758810	TTGCTATGTGATAACCACTTGATGCTGTTTCGGATGATTACGGAATTGTA[Y]GAGCAAACCTGTTGTCTGGGATAAAAACATTTACTGAATTTGTTTACAAA
AX-95252450	38.255	7A	125194368	7B	81667194	7D	120275061	Tu7	126375351	CTGCACTCCAGCTTCATTAGGAACGTCATGTTCAAGTATGCAGTGCTCCA[R]TAGCAGTCTAATGCTTGGTAATGTGACTACCCAGCCCACCAGCGGTGGCT
AX-95080368	40.809	7A	125414771	7B	83004206	7D	121886971	Tu7	124183277	GCATGGGTGAATTCATCCACTAATTAAGTTATCCGAGGGCAGATTTTGTG[R]AATATGCTCTGTACGTTTGTCATCTCTGCAGTCATTAGTTTAGTCTTGTA
AX-94797884	49.388	7A	144057928	7B	106748979	7D	141584786	Tu7	141881222	TTGCGTACGTCTCTGTTGGAGGAATCGTGGCCTCCGTCATTCTCATCGCG[K]CTGTTATCTGGGTAGGAGCATTTGATGGTGTTGGTTTCCACGAGAGAGGC
AX-94673031	49.388	7A	145395360	7B	107579145	7D	144087743	Tu7	143093148	GCTATGCTCGTCGGCGGCGAGGCGACGTTAGCTTTGTTTTCACCGTTCAC[Y]GGTGCTCTGTTCTGGGTCGACGGATGGGGCGCGCGTGCGGGCGTGGGCAG
AX-94406566	49.388	7A	150926120	7B	113179277	7D	151276348	Tu7	148169517	GGACCAACCGAGAAGCCGTCACCGACGAGTGACACAAAGCCATTAGATAG[S]AGCACAACAATTAAAAGACCATGGGGCCGCAGAATAGCCAGTGAGAAATC
AX-95221143	55.096	7A	172907695	7B	527968300			TuUngrouped_contig_7092	9919	CTGTACACCCTCCGAGTCCAGCATGAGCGATGCGGGTGACACAGCGTTGA[Y]AGTGGAAGTGGATTTACACAGTACTTGTGAGGGAGCGACCCTGACCCTGT
AX-94767927	57.215	7A	191103215			7D	180931352	TuUngrouped_contig_6800	6220	GATTGTGTATGACTACTAGGTACTGATAACCTGACAATGCGTGATTGCTG[W]GAACCTCAGAGTGTAGCTAAATTATGTGTACTGCAGTTTGGATGCATGCT
AX-94494916	59.334	7A	224918458	7B	188576669	7D	213323832			GCTTTGAACAGTTCTTACAGTCATCATATGGCAGGTAGTGGGAATTCAAC[Y]TCTGTTGCTGGTGACACGCAACAGATCATGAGTGATGCTTTTTATATTGA
AX-94689244	61.022	7A	236549649	7B	174542357	7D	222092772	Tu7	234987909	ATACAGATGCTGAGGATGGCAGTTGACGATAATTTAGGCTCCGAAATTCC[R]AGGTCGAGCGAACATGAATATAAGGAACAATTCATACTTTTTGTCTCTGT
AX-95215247	61.022	7A	246993158	7B	205689999	7D	234075530	Tu7	246357680	AGGGACTGCAAATGCATTGGAGGAAGTGCCTGTTGCTCAGAGAGGGCTGG[Y]ACGTAGAGCGCCAAAAGGGATGACCAATACTGAGTTCACTGCTTCTCACA
AX-94850011	61.022	7A	249212246	7B	209620419	7D	234302880	Tu7	247850275	CAGTACTGTCGACAGCGGGCGGTGCGACCACATACTTTCCGATCTGGATA[Y]GGTGGTACATGATCTCAAGGTCGCAAACAAGGTCCTCAAGGAGCCTCGGA
AX-94658455	61.022	7A	263660684	7B	223155929	7D	246776759	Tu7	261437789	ATGAGACTTACCTGCATCACTGGGTTGCAGTACCATACTATGCTCTCAAG[R]ACAACCAGAGCTCTGATGCGCAAAAGGTTCCCGCAATGCTTAAAGGGAAT
AX-94565319	61.022	7A	265858157	7B	225483658	7D	248417404	Tu7	262366989	AGATCAACTGATTAGCAATATAGGCATGATGGAACACGAATTGATGGACC[R]GATGGTTTCACTGGATCCATCTTGGTTTAGAATGGGTTGTACTGCTAGTG
AX-94389087	61.022	7A	377906176	7B	307338790	7D	355520099	TuUngrouped_contig_4361	2759	TGAAGTAAAACCCTACAGTGTGAAGCACGAATATGGACAGTGGAATGACA[R]GAAGACTCATCTGACCACTTGCGATCCGAATGCGAAACGTATAATTACAT
AX-94943613	61.859	7A	472050135	7B	425448966	7D	410015476	Tu7	459122156	CTGCGGGAATCCTCATCGGTCGGAAATGGAAATGCCTCTGTTGATGATTC[R]CCCACCCGCACCACAAACATGGACGACCCATTCGGATGCACGACATAGTG
AX-94584631	61.859	7A	467348001	7B	422870467	7D	407976636	Tu7	464881125	AAAATATAGCCACACCAAACTAGGAGTATATAATTGCTAATTTTACGCTC[Y]GGCCAGACTGCATGAGCCACTCCCGGGAGAACCAACTGACTACACAACCC
AX-94529494	63.119	7A	481504477	7B	432885362	7D	416911660	Tu7	476421591	GACCAGCATAATACTTGGTTACCAGGTGGCAGATCACTATCTTGTTCAGA[Y]GGGTCATTCATGCAGGATGGATATCCGAGGTCGAACATTGACAGATCTTC
AX-94976796	63.119	7A	481615387	7B	432906177	7D	416990517	Tu7	456541978	TTCACTACGATGATGTCTTGAATGTGTTTTAGGGGATAGTCAGGAAGGTG[R]ATACAGTTCATTAACACTTTGGCCACACTTTTACCGTAATCTTAAAAGTT
AX-94505780	63.119	7A	505611480	7B	444997188	7D	426959843	TuUngrouped_contig_4361	2995	GCAGAATTGACCATAAAGCAACTCTAGTTGGTGCTTGGCGCACTACTAAC[M]TCATCTGTCCTTGCTCACACCTCAGTTCGTGCAACGATGGGCCTCAGTGT
AX-94387074	71.699	7A	538709688	7B	483749243	7D	461162413	Tu7	532948908	GTGTGCAAAAGTGGATGATCCCTTGGTACAGAGGTGGTGTAGAAACTGCA[R]ATAGTTTCCTTGAATTTGTGTGAAAATAGTGAATTGTCGTGACTAGCCAA
AX-94657270	71.699	7A	538710814	7B	483748304	7D	461161392	Tu7	532949992	TGACACATACAAGAGAATTGATACAAGAAAATTTACAAAGCAGCGGATGT[K]CAAGCAGAAACAAATATATTACAGCTATGACAATGCTGATGCCAGTGCCA
AX-94638909	73.818	7A	542635575	7B	479756751	7D	457969031	Tu7	535528196	CCGCTATTCTCCCAGAGGAGAGGACATCCTGCCCTGATAGGACGACATCG[R]CCATTCCCAGTTACCCACCGAGCTGCGGAGCGATGGCTGCATCACATGCA
AX-95195766	82.398	7A	553310438	7B	512724970	7D	485052910	Tu7	544655632	CAAGGAAGATGTCATGGTGTATATGAAACCGCTGCTGGATTTGTTTTCAC[R]GATCGGCTCACCGTTCTATGTCAATGCATATCCCTTTTTGGCTTACTTAA
AX-94486555	82.398	7A	553314580	7B	512731441	7D	485058415	Tu7	544659828	TCGTAGTACAGTGGTCTACAGTTATGCATGAAGAATTAGCCCTGTATGAG[R]TTCCTCCCATCAGTGGTCTACAGTTATACAACATTTGGGTGTAGTAAATA
AX-95121884	84.951	7A	561529587	7B	524201919	7D	495790504	Tu7	552830246	GTGAGGACTCGCACAGTTTCTCTGCTGCATCCGCAGGTGTACTCCATGGA[Y]GCTGACCGAGTGAGAGTTGTATAGACTATAGAGATACCGCGAGACACGAA
AX-94522885	88.833	7A	577154765	7B	535800955	7D	507381332	Tu7	569310102	ATATCAGGTATAAAGAGGAAAATACATTTTGCCTACATCCACTTCAGCCA[R]TGAGCTCTATCATCTGAACATTTGGCCAGACAGAGGATCATTCCTGATGA
AX-89640006	90.093	7A	608332493	7B	565889837	7D	528097989	TuUngrouped_contig_3531	19245	AGGGTCAATCAAGAGGGAGGAATCCAGCCAAAGAGCTAACAGACAGACAG[R]CATCACTAGACAGAATAATCTGGAGAAAGCATATGGCGAGACGGAAGGGA
AX-94470543	90.51	7A	608917908	7B	676112172	5D	446476091	Tu7	601015620	CACAAAGAGACCACTAACTAGATGCTTGTTAAGAGCTAGAGCTGCATTTC[Y]GACTTGCGGATCAGATGGACCATCATCTTGAGGCTCTCGCTGCTCCTGTC
AX-94632885	90.51	7A	611215966	7B	747068285	3B	156838287	Tu7	602842891	TGTTCTGGACAGTTGATTTTTTACCTTGGAGTGAGAAAAATATACTTTCA[R]TTAGACAAATTTCCCAGCAGTAGATTTTGTTCAGTTCTATATGAGGCCAT
AX-94547905	93.064	7A	635426104	7B	594378255	7D	550056536	Tu7	622073437	GTCAGGCGTGGATGGTGGTGGGTGCCCATAGAGTTGCGGCTGCCAGTCTA[S]TAGGGTATTTATTGCTACACTGTACCCATTGTTGTGTAACTGTATGAATA
AX-94381327	98.771	7A	645017494	7B	608864659	7D	560959215	Tu7	629015490	ATGAGTGGCACGTCTTCACCAATGAGCCATGTTGTTGGCACCAATATTCAAGCTTGTATG[Y]GGAAATGAGAGGAGAGAGCAAGGNTGTATGTGGATGAATC
AX-94468226	103.558	7A	656942051	7B	337082695	4D	475027770	Tu7	630501979	GTCAGCTCATTCCCGCATAAAACAAGCCATGCACGGCAC[M]CAAGCACAAAATATAAACACAAAAAAGGGGCTTACAGCGCAGCCGCACACAATCTCTTGCA
AX-94727017	103.974	7A	659333360	7B	626075242	7D	570605122	Tu7	647158471	CCTTCCTCTGCCCATGTCTTAGATGTATACAGTGGACGGAACGGCTTGCT[Y]GGTAATGGGGGGCGCCTTGGACCGTGGTTATACATAGATTCATCCACAGT
AX-94904043	108.761	7A	675321930	7B	653855527	7D	585258588	Tu7	657774646	CGCAACATCGAGGTGTCGATCCCCACTGGAACGATATTCGGGATATACGA[Y]AGGCTGGTGGAACTCGACCAGCTCCCTGTGGAGGAGAAAGCTCAGCTCAA
AX-95016866	109.177	7A	675433212			7D	86009651	TuUngrouped_contig_6981	13444	ACCATTGAGCGCCGAAAAGGACGGGATGGGGCTAGCAGAAAGGGAGCACC[R]AAATCAGGTTTTAGTTGAGGAGCACCCAGGGGAGCTTCAGGTAGAAGGTG
AX-94667073	109.177	2A	800380041	2D	640232687	7D	576563025	Tu7	653734647	TACGGTAGGAGAGCACGCTTGCGCATGACCGGGTTGTAGATGTAGAATTT[S]TTTTGCTGTATGAGGATGAGGAAGCCATCACAGGTGACTGAGAGCGAAGG
AX-94722616	109.177	2B	677773940	3D	410523015	2D	364954568	Tu7	660358648	GACTTGGACCCAAAGATCATCTCATTCTCTTTACGCAATAGATTGTGCAG[R]TTCTTCTGGTCCTTTGGTAAGAGTCAGTGAACAAGACTGATACTTCTGTT
AX-94859180	117.267	7A	686384770	7B	667739954	7D	593134945	Tu7	707664711	CACACCTGATGGTTGGGAGCAATGGGGATTCAATGACAGAAGTGTTTCAG[R]CAATTATGAAGACAGAGGGCTGGACAGGGCTGTTCCGTGGGAATTTTGTA
AX-94712591	134.423	7A	697689760	1A	160120981			Tu7	679861321	NNNNNNNNNNGTTCATCGAGTGACCTTAATAAAGAATTTAAAAGTTTAAA[S]TGCATACAAAAATCAGCTCTATTTACGGAAGATATGAGAATTACAATCTG
AX-95120046	134.423	7A	697689770	1A	160120971			Tu7	679861331	ACCTTAATAAAGAATTTAAAAGTTTAAACTGCATACAAAAATCAGCTCTA[Y]TTACGGAAGATATGAGAATTACAATCTGCCTCTGATGTGGTCGTTTGTGC
AX-94492165	136.111	7A	700202294	4A	662080662			Tu7	684435115	TGCTGCCCATGCTCTCCCTGTTGGAGCCGATACTACTTCATCTGGCTGCA[Y]TGGGAACCGGACACTATATGAAGCAAATTCTCCAAGCTTGGGGAGCAAAT
AX-95073542	136.111	7A	700202468	4A	662080462	7D	514844357	Tu7	684435303	CTCTACCGCTGCTTCCCATGCTAACTCTGGGCCACCAAAGCTTCTTGCTA[M]CTGAAACTATTTCATGCTCGCCACCAAACTCGCACTGGCGTTTGCTCCTG
