# Supplementary material for: Detection of T. urartu Introgressions in Wheat and Development of a Panel of Interspecific Introgression Lines
Source: Front Plant Sci. 2018 Oct 29;9:1565. doi: 10.3389/fpls.2018.01565 (PMC6216105; doi:10.3389/fpls.2018.01565)
Supplement: Supplementary file 2 [file Table_2.XLSX]

## Sheet: Sheet1
Table S2 Detailed marker genotyping for each of the 17 lines selected for the panel for self-fertilisation. Segments of lines with single introgression are coloured in black in Figure 4. Segments of lines with 2-3 segments are coloured in various shades as indicated below the line names. Introgression from T. urartu for a marker is indicated with an 'h' call (red) in the genotyping. An 'a' call (…
T. urartu parent accession #			1010006	1010006	1010002	1010002		1010002	1010006	1010006	1010006	1010006	1010002	1010002	1010001	1010020		1010006	1010002	1010001	1010020
		Line name	BC4-112B	BC4-112C	BC4-105D	BC3-132A		BC3-131B	BC3-204G	BC2-639B	BC4-104C	BC3-123A	BC3-132C	BC4-108B	BC3-129A	BC2-644B		BC2-641A	BC3-206G	BC2-495B	BC2-649A
		Segment color in Figure 4
Markers	cM
Chr1Au
AX-94908152	0		a	a	a	a		a	a	a	a	a	a	a	a	a		a	a	h	h
AX-94521075	1.695		a	a	a	a		a	a	a	a	a	a	a	a	a		a	a	h	h
AX-95109946	20.128		a	a	a	a		a	a	a	a	a	a	a	a	a		a	a	h	a
AX-95163118	20.128		a	a	a	a		a	a	a	a	a	a	a	a	a		a	a	h	a
AX-94503609	35.07		a	a	a	a		h	a	a	a	a	a	a	a	a		a	a	h	a
AX-94736869	35.07		a	a	a	a		h	a	a	a	a	a	a	a	a		a	a	h	a
AX-95151422	35.07		a	a	a	a		h	a	a	a	a	a	a	a	a		a	a	h	a
AX-94673150	35.07		a	a	a	a		h	a	a	a	a	a	a	a	a		a	a	h	a
AX-94510917	35.07		a	a	a	a		h	a	a	a	a	a	a	a	a		a	a	h	a
AX-95014575	36.336		a	a	a	a		h	a	a	a	a	a	a	a	a		a	a	h	a
AX-94684631	36.336		a	a	a	a		h	a	a	a	a	a	a	a	a		a	a	h	a
AX-94452564	36.336		a	a	a	a		h	a	a	a	a	a	a	a	a		a	a	h	a
AX-95134614	37.177		a	a	a	a		h	a	a	a	a	a	a	a	a		a	a	h	a
AX-86173170	37.177		a	a	a	a		h	a	a	a	a	a	a	a	a		a	a	h	a
AX-94788006	37.177		a	a	a	a		h	a	a	a	a	a	a	a	a		a	a	h	a
AX-94700819	37.177		a	a	a	a		h	a	a	a	a	a	a	a	a		a	a	h	a
AX-95122888	38.443		a	a	a	a		h	a	a	a	a	a	a	a	a		a	a	h	a
AX-94629293	38.443		a	a	a	a		h	a	a	a	a	a	a	a	a		a	a	h	a
AX-94917775	38.443		a	a	a	a		h	a	a	a	a	a	a	a	a		a	a	h	a
AX-95069046	38.443		a	a	a	a		h	a	a	a	a	a	a	a	a		a	a	h	a
AX-94439447	38.443		a	a	a	a		h	a	a	a	a	a	a	a	a		a	a	h	a
AX-94713673	38.443		a	a	a	a		h	a	a	a	a	a	a	a	a		a	a	h	a
AX-94456521	38.443		a	a	a	a		h	a	a	a	a	a	a	a	a		a	a	h	a
AX-94496406	40.571		a	a	a	a		h	a	a	a	a	a	a	a	a		a	a	h	a
AX-94636953	40.989		a	a	a	a		h	a	a	a	a	a	a	a	a		a	a	h	a
AX-94775110	42.255		a	a	a	a		h	a	a	a	a	a	a	a	a		a	a	h	a
AX-94900631	48.457		a	a	a	a		h	a	a	a	a	a	a	a	h		a	a	h	a
AX-94778336	57.076		a	a	a	a		h	a	a	a	a	a	a	a	h		a	a	h	a
AX-94619761	57.916		a	a	a	a		h	a	a	a	a	a	a	a	h		a	a	h	a
AX-94478936	58.757		a	a	a	a		h	a	a	a	a	a	a	a	h		a	a	h	a
AX-94978926	59.175		a	a	a	a		h	a	a	a	a	a	a	a	h		a	a	h	a
AX-95154989	59.175		a	a	a	a		h	a	a	a	a	a	a	a	h		a	a	h	a
AX-94498696	69.301		a	a	a	a		a	a	a	a	a	a	a	a	h		a	a	a	a
AX-94518993	90.841		a	a	a	a		a	a	a	a	a	a	a	a	h		a	a	a	a
AX-94426657	92.536		a	a	a	a		a	a	a	a	a	a	a	a	h		a	a	a	a
AX-94403165	92.536		a	a	a	a		a	a	a	a	a	a	a	a	h		a	a	a	a
Chr2Au
AX-94382746	0		a	a	a	a		a	a	h	a	a	a	a	a	a		h	a	a	a
AX-95121571	3.881		a	a	a	a		a	a	h	a	a	a	a	a	a		h	a	a	a
AX-95158120	3.881		a	a	a	a		a	a	h	a	a	a	a	a	a		h	a	a	a
AX-95080496	3.881		a	a	a	a		a	a	h	a	a	a	a	a	a		h	a	a	a
AX-94958686	3.881		a	a	a	a		a	a	h	a	a	a	a	a	a		h	a	a	a
AX-94673034	3.881		a	a	a	a		a	a	h	a	a	a	a	a	a		h	a	a	a
AX-94945527	3.881		a	a	a	a		a	a	h	a	a	a	a	a	a		h	a	a	a
AX-94897568	3.881		a	a	a	a		a	a	h	a	a	a	a	a	a		h	a	a	a
AX-94511082	3.881		a	a	a	a		a	a	h	a	a	a	a	a	a		h	a	a	a
AX-95205778	3.881		a	a	a	a		a	a	h	a	a	a	a	a	a		h	a	a	a
AX-94443062	3.881		a	a	a	a		a	a	h	a	a	a	a	a	a		h	a	a	a
AX-94649867	3.881		a	a	a	a		a	a	h	a	a	a	a	a	a		h	a	a	a
AX-94427562	3.881		a	a	a	a		a	a	h	a	a	a	a	a	a		h	a	a	a
AX-94451874	3.881		a	a	a	a		a	a	h	a	a	a	a	a	a		h	a	a	a
AX-94601079	3.881		a	a	a	a		a	a	h	a	a	a	a	a	a		h	a	a	a
AX-94547727	5.569		a	a	a	a		a	a	h	a	a	a	a	a	a		h	a	a	a
AX-86165475	5.569		a	a	a	a		a	a	h	a	a	a	a	a	a		h	a	a	a
AX-94793912	7.257		a	a	a	a		a	a	h	a	a	a	a	a	a		h	a	a	a
AX-94450144	7.257		a	a	a	a		a	a	h	a	a	a	a	a	a		h	a	a	a
AX-95204758	18.362		a	a	a	a		a	a	h	a	a	a	a	a	a		h	a	a	a
AX-94508821	21.355		a	a	a	a		a	a	h	a	a	a	a	a	a		h	a	a	a
AX-95225397	21.355		a	a	a	a		a	a	h	a	a	a	a	a	a		h	a	a	a
AX-94929700	39.1		a	a	a	a		a	a	h	a	a	a	a	h	a		h	a	a	a
AX-95250028	39.516		a	a	a	a		a	a	h	a	a	a	a	h	a		h	a	a	a
AX-94448733	60.311		a	a	a	a		a	a	h	a	a	a	a	h	a		h	a	a	a
AX-94433355	61.572		a	a	a	a		a	a	h	a	a	a	a	h	a		h	a	a	a
AX-95247903	62.832		a	a	a	a		a	a	h	a	a	a	a	h	a		h	a	a	a
AX-94632739	70.921		a	a	a	a		a	a	h	a	a	a	a	h	a		h	a	a	a
AX-95192332	72.609		a	a	a	a		a	a	h	a	a	a	a	h	a		h	a	a	a
AX-95259382	72.609		a	a	a	a		a	a	h	a	a	a	a	h	a		h	a	a	a
AX-94538364	75.602		a	a	a	a		a	a	h	a	a	a	a	h	a		h	a	a	a
AX-95176938	75.602		a	a	a	a		a	a	h	a	a	a	a	h	a		h	a	a	a
AX-94629399	79.933		a	a	a	a		a	a	h	a	a	a	a	h	a		a	a	a	a
AX-94896111	79.933		a	a	a	a		a	a	h	a	a	a	a	h	a		a	a	a	a
AX-94756243	81.621		a	a	a	a		a	a	h	a	a	a	a	h	a		a	a	a	a
AX-95072207	82.038		a	a	a	a		a	a	h	a	a	a	a	h	a		a	a	a	a
AX-94485513	82.038		a	a	a	a		a	a	h	a	a	a	a	h	a		a	a	a	a
AX-94638064	82.038		a	a	a	a		a	a	h	a	a	a	a	h	a		a	a	a	a
AX-94573816	82.875		a	a	a	a		a	a	h	a	a	a	a	h	a		a	a	a	a
AX-95106097	82.875		a	a	a	a		a	a	h	a	a	a	a	h	a		a	a	a	a
AX-94528590	82.875		a	a	a	a		a	a	h	a	a	a	a	h	a		a	a	a	a
AX-94443516	82.875		a	a	a	a		a	a	h	a	a	a	a	h	a		a	a	a	a
AX-94853843	82.875		a	a	a	a		a	a	h	a	a	a	a	h	a		a	a	a	a
AX-95115213	82.875		a	a	a	a		a	a	h	a	a	a	a	h	a		a	a	a	a
AX-94727794	83.292		a	a	a	a		a	a	h	a	a	a	a	h	a		a	a	a	a
AX-94412799	83.292		a	a	a	a		a	a	h	a	a	a	a	h	a		a	a	a	a
AX-94507961	83.292		a	a	a	a		a	a	h	a	a	a	a	h	a		a	a	a	a
AX-94394887	83.292		a	a	a	a		a	a	h	a	a	a	a	h	a		a	a	a	a
AX-86165901	83.292		a	a	a	a		a	a	h	a	a	a	a	h	a		a	a	a	a
AX-94504198	83.292		a	a	a	a		a	a	h	a	a	a	a	h	a		a	a	a	a
AX-94396146	90.895		a	a	a	a		a	a	h	a	a	a	a	h	a		a	a	a	a
AX-94730121	90.895		a	a	a	a		a	a	h	a	a	a	a	h	a		a	a	a	a
AX-94911937	91.312		a	a	a	a		a	a	h	a	a	a	a	h	a		a	a	a	a
AX-94462589	91.312		a	a	a	a		a	a	h	a	a	a	a	h	a		a	a	a	a
AX-94678573	91.312		a	a	a	a		a	a	h	a	a	a	a	h	a		a	a	a	a
AX-94501526	92.573		a	a	a	a		a	a	h	a	a	a	a	h	a		a	a	a	a
AX-94562168	96.008		a	a	a	a		a	a	h	a	a	a	a	h	a		a	a	a	a
AX-94470139	96.424		a	a	a	a		a	a	h	a	a	a	a	h	a		a	a	a	a
AX-94603408	96.424		a	a	a	a		a	a	h	a	a	a	a	h	a		a	a	a	a
AX-94394578	98.543		a	a	a	a		a	a	h	a	a	a	a	h	a		a	a	a	a
AX-94680402	98.543		a	a	a	a		a	a	h	a	a	a	a	h	a		a	a	a	a
AX-95188312	98.543		a	a	a	a		a	a	h	a	a	a	a	h	a		a	a	a	a
AX-94636452	98.543		a	a	a	a		a	a	h	a	a	a	a	h	a		a	a	a	a
AX-94697318	98.543		a	a	a	a		a	a	h	a	a	a	a	h	a		a	a	a	a
AX-95131782	98.543		a	a	a	a		a	a	h	a	a	a	a	h	a		a	a	a	a
AX-94422720	100.231		a	a	a	a		a	a	h	a	a	a	a	h	a		a	a	a	a
AX-94409581	100.231		a	a	a	a		a	a	h	a	a	a	a	h	a		a	a	a	a
AX-95169440	107.354		a	a	a	a		a	a	h	a	a	a	a	h	a		a	a	a	a
AX-94818415	107.354		a	a	a	a		a	a	h	a	a	a	a	h	a		a	a	a	a
AX-94423228	112.599		a	a	a	a		a	a	h	a	a	a	a	h	a		a	a	a	a
AX-94427576	117.844		a	a	a	a		a	a	h	a	a	a	h	h	a		a	a	a	a
AX-94539132	124.491		a	a	a	a		a	a	a	a	a	a	h	h	a		a	a	a	a
AX-94700994	127.483		a	a	a	a		a	a	a	a	a	a	h	h	a		a	a	a	a
AX-94453516	142.354		a	a	a	a		a	a	a	a	a	a	h	h	a		a	a	a	a
AX-95232561	147.14		a	a	a	a		a	a	a	a	a	a	a	h	a		a	a	a	a
Chr3Au
AX-94785800	0		a	a	a	a		a	a	a	a	a	h	a	a	a		a	a	a	a
AX-94431861	7.123		a	a	a	a		a	a	a	a	a	h	a	a	a		a	a	a	a
AX-94831522	13.298		a	a	a	a		a	a	a	a	a	h	a	a	a		a	a	a	a
AX-95150564	27.613		a	a	a	h		a	a	a	a	a	h	a	a	a		a	a	a	a
AX-94434800	28.03		a	a	a	h		a	a	a	a	a	h	a	a	a		a	a	a	a
AX-94410592	28.03		a	a	a	h		a	a	a	a	a	h	a	a	a		a	a	a	a
AX-94542938	35.634		a	a	a	h		a	a	a	a	a	h	a	a	a		a	a	a	a
AX-95220838	42.281		a	a	a	h		a	a	a	a	a	h	a	a	a		a	a	a	h
AX-95245143	42.281		a	a	a	h		a	a	a	a	a	h	a	a	a		a	a	a	h
AX-94783547	42.698		a	a	a	h		a	a	a	a	a	h	a	a	a		a	a	a	h
AX-94502353	42.698		a	a	a	h		a	a	a	a	a	h	a	a	a		a	a	a	h
AX-94852544	42.698		a	a	a	h		a	a	a	a	a	h	a	a	a		a	a	a	h
AX-94677134	42.698		a	a	a	h		a	a	a	a	a	h	a	a	a		a	a	a	h
AX-95193187	43.534		a	a	a	h		a	a	a	a	a	h	a	a	a		a	a	a	h
AX-95130498	43.951		a	a	a	h		a	a	a	a	a	h	a	a	a		a	a	a	h
AX-94586703	43.951		a	a	a	h		a	a	a	a	a	h	a	a	a		a	a	a	h
AX-94428990	43.951		a	a	a	h		a	a	a	a	a	h	a	a	a		a	a	a	h
AX-94411566	44.368		a	a	a	h		a	a	a	a	a	h	a	a	a		a	a	a	h
AX-95630046	44.368		a	a	a	h		a	a	a	a	a	h	a	a	a		a	a	a	h
AX-94928542	44.368		a	a	a	h		a	a	a	a	a	h	a	a	a		a	a	a	h
AX-95216392	44.368		a	a	a	h		a	a	a	a	a	h	a	a	a		a	a	a	h
AX-94496167	47.36		a	a	a	h		a	a	a	a	a	h	a	a	a		a	a	a	h
AX-94731499	49.048		a	a	a	h		a	a	a	a	a	h	a	a	a		a	a	a	h
AX-95163612	55.223		a	a	a	h		a	a	a	a	a	h	a	a	a		a	a	a	h
AX-94636269	56.911		a	a	a	h		a	a	a	a	a	h	a	a	a		a	a	a	h
AX-94415137	64.034		a	a	a	h		a	a	a	a	a	h	a	a	a		a	h	a	h
AX-94598825	69.279		a	a	a	h		h	a	a	a	a	h	a	a	a		a	h	a	h
AX-94485226	69.696		a	a	a	h		h	a	a	a	a	h	a	a	a		a	h	a	h
AX-94743140	73.131		a	a	a	h		h	a	a	a	a	h	a	a	a		a	h	a	h
AX-94525582	77.012		a	a	a	h		h	a	a	a	a	h	a	a	a		a	h	a	h
AX-95235286	77.429		a	a	a	h		h	a	a	a	a	h	a	a	a		a	h	a	h
AX-94794743	78.689		a	a	a	h		h	a	a	a	a	h	a	a	a		a	h	a	a
AX-94949614	85.336		a	a	a	a		h	a	a	a	a	a	a	a	a		a	a	a	a
AX-94571633	85.336		a	a	a	a		h	a	a	a	a	a	a	a	a		a	a	a	a
AX-86179203	89.668		a	a	a	a		h	a	a	a	a	a	a	a	a		a	a	a	a
AX-95158489	93.103		a	a	a	a		h	a	a	a	a	a	a	a	a		a	a	a	a
AX-94578210	93.103		a	a	a	a		h	a	a	a	a	a	a	a	a		a	a	a	a
AX-94669658	95.656		a	a	a	a		h	a	a	a	a	a	a	a	a		a	a	a	a
AX-95111068	107.809		a	a	a	a		h	a	a	a	a	a	a	a	a		a	a	a	a
AX-89326853	108.226		a	a	a	a		h	a	a	a	a	a	a	a	a		a	a	a	a
AX-94886901	108.642		a	a	a	a		h	a	a	a	a	a	a	a	a		a	a	a	a
Chr4Au
AX-94561738	0		a	a	a	a		a	a	a	a	a	a	a	a	a		a	h	a	a
AX-94853868	3.881		a	a	a	a		a	a	a	a	a	a	a	a	a		a	h	a	a
AX-94797674	3.881		a	a	a	a		a	a	a	a	a	a	a	a	a		a	h	a	a
AX-94545917	3.881		a	a	a	a		a	a	a	a	a	a	a	a	a		a	h	a	a
AX-94678384	3.881		a	a	a	a		a	a	a	a	a	a	a	a	a		a	h	a	a
AX-94568929	3.881		a	a	a	a		a	a	a	a	a	a	a	a	a		a	h	a	a
AX-94886021	4.298		a	a	a	a		a	a	a	a	a	a	a	a	a		a	h	a	a
AX-94825513	6.852		a	a	a	a		a	a	a	a	a	a	a	a	a		a	h	a	a
AX-94397930	6.852		a	a	a	a		a	a	a	a	a	a	a	a	a		a	h	a	a
AX-94680920	8.54		a	a	a	a		a	a	a	a	a	a	a	a	a		a	h	a	a
AX-94518497	8.54		a	a	a	a		a	a	a	a	a	a	a	a	a		a	h	a	a
AX-94862616	8.956		a	a	a	a		a	a	a	a	a	a	a	a	a		a	h	a	a
AX-94945797	12.838		a	a	a	a		a	a	a	a	h	a	a	a	a		a	h	a	a
AX-95150779	12.838		a	a	a	a		a	a	a	a	h	a	a	a	a		a	h	a	a
AX-94472289	12.838		a	a	a	a		a	a	a	a	h	a	a	a	a		a	h	a	a
AX-94479623	12.838		a	a	a	a		a	a	a	a	h	a	a	a	a		a	h	a	a
AX-95161863	12.838		a	a	a	a		a	a	a	a	h	a	a	a	a		a	h	a	a
AX-94921669	12.838		a	a	a	a		a	a	a	a	h	a	a	a	a		a	h	a	a
AX-95190358	12.838		a	a	a	a		a	a	a	a	h	a	a	a	a		a	h	a	a
AX-94855600	12.838		a	a	a	a		a	a	a	a	h	a	a	a	a		a	h	a	a
AX-94505752	12.838		a	a	a	a		a	a	a	a	h	a	a	a	a		a	h	a	a
AX-94412085	12.838		a	a	a	a		a	a	a	a	h	a	a	a	a		a	h	a	a
AX-94414030	12.838		a	a	a	a		a	a	a	a	h	a	a	a	a		a	h	a	a
AX-94576066	13.254		a	a	a	a		a	a	a	a	h	a	a	a	a		a	h	a	a
AX-94476473	13.254		a	a	a	a		a	a	a	a	h	a	a	a	a		a	h	a	a
AX-94787314	13.671		a	a	a	a		a	a	a	a	h	a	a	a	a		a	h	a	a
AX-94693037	13.671		a	a	a	a		a	a	a	a	h	a	a	a	a		a	h	a	a
AX-94832412	16.663		h	a	a	a		a	a	a	a	h	a	a	a	a		a	h	a	a
AX-94387796	20.995		h	a	a	a		a	a	a	a	h	a	a	a	a		a	h	a	a
AX-94807329	20.995		h	a	a	a		a	a	a	a	h	a	a	a	a		a	h	a	a
AX-94529621	20.995		h	a	a	a		a	a	a	a	h	a	a	a	a		a	h	a	a
AX-94953480	21.412		h	a	a	a		a	a	a	a	h	a	a	a	a		a	h	a	a
AX-95179478	21.412		h	a	a	a		a	a	a	a	h	a	a	a	a		a	h	a	a
AX-95243342	21.412		h	a	a	a		a	a	a	a	h	a	a	a	a		a	h	a	a
AX-94554728	21.412		h	a	a	a		a	a	a	a	h	a	a	a	a		a	h	a	a
AX-94457436	22.672		h	a	a	a		a	a	a	a	h	a	a	a	a		a	h	a	a
AX-94430995	24.36		h	a	a	a		a	a	a	a	h	a	a	a	a		a	h	a	a
AX-94579148	24.36		h	a	a	a		a	a	a	a	h	a	a	a	a		a	h	a	a
AX-94750909	24.36		h	a	a	a		a	a	a	a	h	a	a	a	a		a	h	a	a
AX-94449850	24.36		h	a	a	a		a	a	a	a	h	a	a	a	a		a	h	a	a
AX-94757730	31.007		h	a	a	a		a	a	a	a	h	a	a	a	a		h	h	a	a
Chr5Au
AX-94418907	0		a	a	a	a		a	a	a	a	a	a	h	a	a		a	a	a	a
AX-95251288	0		a	a	a	a		a	a	a	a	a	a	h	a	a		a	a	a	a
AX-94462983	0.417		a	a	a	a		a	a	a	a	a	a	h	a	a		a	a	a	a
AX-94909932	15.287		a	a	a	a		a	a	a	a	a	a	h	a	a		a	a	a	a
AX-94706493	17.841		a	a	a	a		a	a	a	a	a	a	h	a	a		a	a	a	a
AX-94406033	18.258		a	a	a	a		a	a	a	a	a	a	h	a	a		a	a	a	a
AX-95161525	18.258		a	a	a	a		a	a	a	a	a	a	h	a	a		a	a	a	a
AX-94623475	18.258		a	a	a	a		a	a	a	a	a	a	h	a	a		a	a	a	a
AX-94573346	21.692		a	a	a	a		a	a	a	a	a	a	h	a	a		a	a	a	a
AX-95194447	22.529		a	a	a	a		a	a	a	a	a	a	h	a	a		a	a	a	a
AX-94647555	26.861		a	a	a	a		a	a	a	h	a	a	h	a	a		a	a	a	a
AX-94922512	26.861		a	a	a	a		a	a	a	h	a	a	h	a	a		a	a	a	a
AX-95240400	26.861		a	a	a	a		a	a	a	h	a	a	h	a	a		a	a	a	a
AX-94999851	28.122		a	a	a	a		a	a	a	h	a	a	h	a	a		a	a	a	a
AX-94403987	31.556		a	a	a	a		a	a	a	h	a	a	h	a	a		a	a	a	a
AX-94477803	31.973		a	a	a	a		a	a	a	h	a	a	h	a	a		a	a	a	a
AX-94675621	31.973		a	a	a	a		a	a	a	h	a	a	h	a	a		a	a	a	a
AX-94489520	31.973		a	a	a	a		a	a	a	h	a	a	h	a	a		a	a	a	a
AX-95231293	31.973		a	a	a	a		a	a	a	h	a	a	h	a	a		a	a	a	a
AX-94864905	31.973		a	a	a	a		a	a	a	h	a	a	h	a	a		a	a	a	a
AX-94680001	32.81		a	a	a	a		a	a	a	h	a	a	h	a	a		a	a	a	a
AX-95183070	32.81		a	a	a	a		a	a	a	h	a	a	h	a	a		a	a	a	a
AX-95166372	32.81		a	a	a	a		a	a	a	h	a	a	h	a	a		a	a	a	a
AX-94545883	32.81		a	a	a	a		a	a	a	h	a	a	h	a	a		a	a	a	a
AX-95213331	32.81		a	a	a	a		a	a	a	h	a	a	h	a	a		a	a	a	a
AX-94872516	32.81		a	a	a	a		a	a	a	h	a	a	h	a	a		a	a	a	a
AX-94940126	32.81		a	a	a	a		a	a	a	h	a	a	h	a	a		a	a	a	a
AX-94635581	32.81		a	a	a	a		a	a	a	h	a	a	h	a	a		a	a	a	a
AX-94860483	32.81		a	a	a	a		a	a	a	h	a	a	h	a	a		a	a	a	a
AX-94724532	32.81		a	a	a	a		a	a	a	h	a	a	h	a	a		a	a	a	a
AX-94653176	32.81		a	a	a	a		a	a	a	h	a	a	h	a	a		a	a	a	a
AX-94592593	32.81		a	a	a	a		a	a	a	h	a	a	h	a	a		a	a	a	a
AX-95106604	32.81		a	a	a	a		a	a	a	h	a	a	h	a	a		a	a	a	a
AX-94620820	34.498		a	a	a	a		a	a	a	h	a	a	h	a	a		a	a	a	a
AX-94720622	34.915		a	a	a	a		a	a	a	h	a	a	h	a	a		a	a	a	a
AX-94530100	37.907		a	a	a	a		a	a	a	h	a	a	a	a	a		a	a	a	a
AX-94945951	37.907		a	a	a	a		a	a	a	h	a	a	a	a	a		a	a	a	a
AX-94610088	37.907		a	a	a	a		a	a	a	h	a	a	a	a	a		a	a	a	a
AX-94549037	37.907		a	a	a	a		a	a	a	h	a	a	a	a	a		a	a	a	a
AX-95137032	39.595		a	a	a	a		a	a	a	h	a	a	a	a	a		a	a	a	a
AX-95184336	39.595		a	a	a	a		a	a	a	h	a	a	a	a	a		a	a	a	a
AX-94643878	44.84		a	a	a	a		a	a	a	h	a	a	a	a	a		a	a	a	a
AX-95156762	45.677		a	a	a	a		a	a	a	h	a	a	a	a	a		a	a	a	a
AX-94466093	65.846		a	a	a	a		a	a	a	h	a	a	a	a	a		a	a	a	a
AX-94569085	68.4		a	a	a	a		a	a	a	h	a	a	a	a	a		a	a	a	a
AX-94538890	75.523		a	a	a	a		a	a	a	h	h	a	a	a	a		a	a	a	a
AX-94426799	75.523		a	a	a	a		a	a	a	h	h	a	a	a	a		a	a	a	a
AX-94997175	79.855		a	a	a	a		a	a	a	h	h	a	a	a	a		h	a	a	a
AX-94415346	81.974		a	a	a	a		a	a	a	h	h	a	a	a	a		h	a	a	a
AX-95248126	81.974		a	a	a	a		a	a	a	h	h	a	a	a	a		h	a	a	a
AX-94688509	85.409		a	a	a	a		a	a	a	h	h	a	a	a	a		h	a	a	a
AX-94456236	89.29		a	a	a	a		a	a	a	h	h	a	a	a	a		h	a	a	a
AX-94899135	94.535		a	a	a	a		a	a	a	h	h	a	a	a	a		h	a	a	a
AX-95250063	94.952		a	a	a	a		a	a	a	h	h	a	a	a	a		h	a	a	a
AX-94924345	98.386		a	a	a	a		a	a	a	h	a	a	a	a	a		h	a	a	a
AX-94428806	98.386		a	a	a	a		a	a	a	h	a	a	a	a	a		h	a	a	a
AX-95177729	98.386		a	a	a	a		a	a	a	h	a	a	a	a	a		h	a	a	a
AX-95073230	98.386		a	a	a	a		a	a	a	h	a	a	a	a	a		h	a	a	a
AX-95097918	100.074		a	a	a	a		a	a	a	h	a	a	a	a	a		h	a	a	a
AX-94945628	104.406		a	a	a	a		a	a	a	a	a	a	a	a	a		h	a	a	a
AX-94430309	104.406		a	a	a	a		a	a	a	a	a	a	a	a	a		h	a	a	a
AX-95191725	104.823		a	a	a	a		a	a	a	a	a	a	a	a	a		h	a	a	a
AX-94385638	104.823		a	a	a	a		a	a	a	a	a	a	a	a	a		h	a	a	a
AX-94891640	110.531		a	a	a	a		a	a	a	a	a	a	a	a	a		h	a	a	a
AX-95137623	116.239		a	a	a	a		a	a	a	a	a	a	a	a	a		h	a	a	a
AX-95095036	116.239		a	a	a	a		a	a	a	a	a	a	a	a	a		h	a	a	a
AX-94903992	116.239		a	a	a	a		a	a	a	a	a	a	a	a	a		h	a	a	a
AX-94399337	123.362		a	a	a	a		a	a	a	a	a	a	a	a	a		h	a	a	a
AX-94557327	131.941		a	a	a	a		a	a	a	a	a	a	a	a	a		h	a	a	a
AX-94497385	131.941		a	a	a	a		a	a	a	a	a	a	a	a	a		h	a	a	a
AX-95095532	132.358		a	a	a	a		a	a	a	a	a	a	a	a	a		h	a	a	a
AX-94381965	134.477		a	a	a	a		a	a	a	a	a	a	a	a	a		h	a	a	a
AX-95079379	135.314		a	a	a	a		a	a	a	a	a	a	a	a	a		h	a	a	a
AX-94483629	135.314		a	a	a	a		a	a	a	a	a	a	a	a	a		h	a	a	a
AX-94622175	135.314		a	a	a	a		a	a	a	a	a	a	a	a	a		h	a	a	a
AX-94815565	135.314		a	a	a	a		a	a	a	a	a	a	a	a	a		h	a	a	a
AX-94795640	135.314		a	a	a	a		a	a	a	a	a	a	a	a	a		h	a	a	a
AX-94504845	139.195		a	a	a	a		a	a	a	a	a	a	a	a	a		h	a	a	a
AX-94398500	140.456		a	a	a	a		a	a	a	a	a	a	a	a	a		h	a	a	a
AX-94445171	142.574		a	a	a	a		a	a	a	a	a	a	a	a	a		h	a	a	a
AX-86179557	146.009		a	a	a	a		a	a	a	a	a	a	a	a	a		a	a	a	a
Chr6Au
AX-95193570	0		a	a	a	a		a	a	a	a	a	a	a	a	h		a	a	a	a
AX-94805250	0		a	a	a	a		a	a	a	a	a	a	a	a	h		a	a	a	a
AX-94700575	6.175		a	a	a	a		a	a	a	a	a	a	a	a	h		a	a	a	a
AX-94414937	12.822		a	a	a	a		a	a	a	a	a	a	a	a	h		a	a	h	h
AX-94388846	18.997		a	a	a	a		a	a	a	a	a	a	a	a	h		a	a	h	h
AX-94892706	24.705		a	a	a	a		a	a	a	a	a	a	a	a	h		a	a	h	h
AX-94663483	25.542		a	a	a	a		a	a	a	a	a	a	a	a	h		a	a	h	h
AX-86167869	35.622		a	a	a	a		a	h	a	a	a	a	a	a	h		a	a	h	h
AX-94446593	39.503		a	a	a	a		a	h	a	a	a	a	a	a	h		a	a	h	h
AX-94417743	39.92		a	a	a	a		a	h	a	a	a	a	a	a	h		a	a	h	h
AX-94988417	46.567		a	a	a	a		a	h	a	a	a	a	a	a	h		a	a	h	h
AX-94711679	46.567		a	a	a	a		a	h	a	a	a	a	a	a	h		a	a	h	h
AX-94645609	46.567		a	a	a	a		a	h	a	a	a	a	a	a	h		a	a	h	h
AX-94462450	46.567		a	a	a	a		a	h	a	a	a	a	a	a	h		a	a	h	h
AX-94629403	46.567		a	a	a	a		a	h	a	a	a	a	a	a	h		a	a	h	h
AX-95199148	46.567		a	a	a	a		a	h	a	a	a	a	a	a	h		a	a	h	h
AX-94910882	46.567		a	a	a	a		a	h	a	a	a	a	a	a	h		a	a	h	h
AX-94674861	46.567		a	a	a	a		a	h	a	a	a	a	a	a	h		a	a	h	h
AX-95140098	47.827		a	a	a	a		a	h	a	a	a	a	a	a	h		a	a	h	h
AX-94433552	56.407		a	a	a	a		a	h	a	a	a	a	a	a	a		a	a	a	h
AX-94488716	62.115		a	a	a	a		a	h	h	a	a	a	a	a	a		a	a	a	h
AX-94468806	62.115		a	a	a	a		a	h	h	a	a	a	a	a	a		a	a	a	h
AX-94664517	66.447		a	a	a	a		a	h	h	a	a	a	a	a	a		a	a	a	h
AX-94920318	67.707		a	a	a	a		a	h	h	a	a	a	a	a	a		a	a	a	h
AX-95630343	67.707		a	a	a	a		a	h	h	a	a	a	a	a	a		a	a	a	h
AX-94935112	68.544		a	a	a	a		a	h	h	a	a	a	a	a	a		a	a	a	h
AX-94478906	68.544		a	a	a	a		a	h	h	a	a	a	a	a	a		a	a	a	h
AX-95630344	70.663		a	a	a	a		a	h	h	a	a	h	a	a	a		a	a	a	h
AX-94551877	73.655		a	a	a	a		a	h	h	a	a	h	a	a	a		a	a	a	a
AX-94430975	75.343		a	a	a	a		a	h	h	a	a	h	a	a	a		a	a	a	a
AX-94805147	79.675		a	a	a	a		a	h	h	a	a	h	a	a	a		a	a	a	a
AX-94420467	81.794		a	a	a	a		a	h	h	a	a	h	a	a	a		a	a	a	a
AX-95143639	88.917		a	a	a	a		a	h	h	a	a	h	a	a	a		a	a	a	a
AX-94486279	91.471		a	a	a	a		a	h	h	a	a	h	a	a	a		a	a	a	a
AX-94978966	91.471		a	a	a	a		a	h	h	a	a	h	a	a	a		a	a	a	a
AX-95211372	96.257		a	a	a	a		a	h	h	a	a	a	a	a	a		a	a	a	a
AX-94517126	106.847		a	a	a	a		a	h	h	a	a	a	a	a	a		a	a	a	a
AX-94507628	109.839		a	a	a	a		a	h	h	a	a	a	a	a	a		a	a	a	a
AX-94981543	110.676		a	a	a	a		a	h	h	a	a	a	a	a	a		a	a	a	a
Chr7Au
AX-94901129	0		a	a	a	a		a	a	a	h	a	a	a	a	a		a	a	h	a
AX-94700184	0		a	a	a	a		a	a	a	h	a	a	a	a	a		a	a	h	a
AX-94732708	6.647		a	a	a	a		a	a	a	h	a	a	a	a	a		a	a	h	a
AX-95122633	8.335		a	a	a	a		a	a	a	h	a	a	a	a	a		a	a	h	a
AX-94609778	10.889		a	a	a	a		a	a	a	h	a	a	a	a	a		a	a	h	a
AX-94847486	13.881		a	a	h	a		a	a	a	h	a	a	a	a	a		a	a	h	a
AX-94407354	29.313		a	a	h	a		a	a	a	h	a	a	a	a	a		a	a	h	a
AX-94945900	30.15		a	a	h	a		a	a	a	h	a	a	a	a	a		a	h	h	a
AX-94933672	32.269		a	a	h	a		a	a	a	h	a	a	a	a	a		a	h	h	a
AX-95200460	32.269		a	a	h	a		a	a	a	h	a	a	a	a	a		a	h	h	a
AX-95205348	32.686		a	a	h	a		a	a	a	h	a	a	a	a	a		a	h	h	a
AX-94733664	32.686		a	a	h	a		a	a	a	h	a	a	a	a	a		a	h	h	a
AX-94683427	36.567		a	a	h	a		a	a	a	h	a	a	a	a	a		a	h	h	a
AX-95252450	38.255		a	a	h	a		a	a	a	h	a	a	a	a	a		a	h	h	a
AX-95080368	40.809		a	a	h	a		a	a	a	h	a	a	a	a	a		a	h	h	a
AX-94797884	49.388		a	h	h	a		a	h	a	h	a	a	a	a	a		a	h	h	a
AX-94673031	49.388		a	h	h	a		a	h	a	h	a	a	a	a	a		a	h	h	a
AX-94406566	49.388		a	h	h	a		a	h	a	h	a	a	a	a	a		a	h	h	a
AX-95221143	55.096		a	h	h	a		a	h	a	a	a	a	a	a	a		a	h	h	a
AX-94767927	57.215		a	h	h	a		a	h	a	a	a	a	a	a	a		a	h	h	a
AX-94494916	59.334		a	h	h	a		a	h	a	a	a	a	a	a	a		a	h	h	a
AX-94689244	61.022		a	h	h	a		a	h	a	a	a	a	a	a	a		a	h	h	a
AX-95215247	61.022		a	h	h	a		a	h	a	a	a	a	a	a	a		a	h	h	a
AX-94850011	61.022		a	h	h	a		a	h	a	a	a	a	a	a	a		a	h	h	a
AX-94658455	61.022		a	h	h	a		a	h	a	a	a	a	a	a	a		a	h	h	a
AX-94565319	61.022		a	h	h	a		a	h	a	a	a	a	a	a	a		a	h	h	a
AX-94389087	61.022		a	h	h	a		a	h	a	a	a	a	a	a	a		a	h	h	a
AX-94584631	61.859		a	h	h	a		a	h	a	a	a	a	a	a	a		a	h	h	a
AX-94943613	61.859		a	h	h	a		a	h	a	a	a	a	a	a	a		a	h	h	a
AX-94529494	63.119		a	h	h	a		a	h	a	a	a	a	a	a	a		a	h	h	a
AX-94976796	63.119		a	h	h	a		a	h	a	a	a	a	a	a	a		a	h	h	a
AX-94505780	63.119		a	h	h	a		a	h	a	a	a	a	a	a	a		a	h	h	a
AX-94387074	71.699		a	h	h	a		a	h	a	a	a	a	a	a	a		a	h	h	a
AX-94657270	71.699		a	h	h	a		a	h	a	a	a	a	a	a	a		a	h	h	a
AX-94638909	73.818		a	h	h	a		a	h	a	a	a	a	a	a	a		a	h	h	a
AX-95195766	82.398		a	a	h	a		a	h	a	a	a	a	a	a	a		a	h	h	a
AX-94486555	82.398		a	a	h	a		a	h	a	a	a	a	a	a	a		a	h	h	a
AX-95121884	84.951		a	a	h	a		a	h	a	a	a	a	a	h	a		a	h	h	a
AX-94522885	88.833		a	a	a	a		a	h	a	a	a	a	a	h	a		a	h	h	a
AX-89640006	90.093		a	a	a	a		a	h	a	a	a	a	a	h	a		a	h	h	a
AX-94470543	90.51		a	a	a	a		a	h	a	a	a	a	a	h	a		a	h	h	a
AX-94632885	90.51		a	a	a	a		a	h	a	a	a	a	a	h	a		a	h	h	a
AX-94547905	93.064		a	a	a	a		a	h	a	a	a	a	a	h	a		a	h	h	a
AX-94381327	98.771		a	a	a	a		a	h	a	a	a	a	a	h	a		a	h	h	a
AX-94468226	103.558		a	a	a	a		a	h	a	a	a	a	a	a	a		a	h	h	a
AX-94727017	103.974		a	a	a	a		a	h	a	a	a	a	a	a	a		a	h	h	a
AX-94904043	108.761		a	a	a	a		a	h	a	a	a	a	a	a	a		a	h	a	a
AX-95016866	109.177		a	a	a	a		a	h	a	a	a	a	a	a	a		a	h	a	a
AX-94667073	109.177		a	a	a	a		a	h	a	a	a	a	a	a	a		a	h	a	a
AX-94722616	109.177		a	a	a	a		a	h	a	a	a	a	a	a	a		a	h	a	a
AX-94859180	117.267		a	a	a	a		a	h	a	a	a	a	a	a	a		a	h	a	a
AX-94712591	134.423		a	a	a	a		a	a	a	a	a	a	a	a	a		a	h	a	a
AX-95120046	134.423		a	a	a	a		a	a	a	a	a	a	a	a	a		a	h	a	a
AX-94492165	136.111		a	a	a	a		a	a	a	a	a	a	a	a	a		a	h	a	a
AX-95073542	136.111		a	a	a	a		a	a	a	a	a	a	a	a	a		a	h	a	a
